# Supplementary material for: The Study of Hypoglycemic Activity of 7-Terpenylcoumarins
Source: MDPI journal article supplement (doi:10.3390/molecules27248663), 2022-12-07
Supplement: s1 [file s1]

## **Supporting Information for:**

### **The study of hypoglycemic activity of 7-terpenylcoumarines**

Sergey Kuranov, Mariya Marenina, Dmitriy Ivankin, Mikhail Blokhin, Sergey Borisov, Tatyana Khomenko, Olga Luzina\*, Mikhail Khvostov, Konstantin Volcho, Tatyana Tolstikova, Nariman Salakhutdinov

N. N. Vorozhtsov Novosibirsk Institute of Organic Chemistry, 9, Akademika Lavrentieva Ave., Novosibirsk, 630090, Russian Federation; luzina@nioch.nsc.ru

\* Correspondence: luzina@nioch.nsc.ru

# INDEX

|                                                                                                                                                    |    |
|----------------------------------------------------------------------------------------------------------------------------------------------------|----|
| (E)-7-(3,7-Dimethylocta-2,6-dienyloxy)-4-methyl-2H-chromen-2-one <sup>1</sup> H NMR spectrum (6a)...                                               | 4  |
| 7-(((1R,5S)-6,6-Dimethylbicyclo[3.1.1]hept-2-en-2-yl)methoxy)-4-methyl-2H-chromen-2-one <sup>1</sup> H NMR spectrum (6b) .....                     | 5  |
| 7-(((1S,5R)-6,6-Dimethylbicyclo[3.1.1]hept-2-en-2-yl)methoxy)-4-methyl-2H-chromen-2-one <sup>1</sup> H NMR spectrum (6c).....                      | 6  |
| 7-(2-((1R,5S)-6,6-Dimethylbicyclo[3.1.1]hept-2-en-2-yl)ethoxy)-4-methyl-2H-chromen-2-one <sup>1</sup> H NMR spectrum (6d) .....                    | 7  |
| 7-(2-((1R,5S)-6,6-Dimethylbicyclo[3.1.1]hept-2-en-2-yl)ethoxy)-4-methyl-2H-chromen-2-one <sup>13</sup> C NMR spectrum (6d) .....                   | 8  |
| 7-(2-((1R,5S)-6,6-Dimethylbicyclo[3.1.1]hept-2-en-2-yl)ethoxy)-4-methyl-2H-chromen-2-one HRMS spectra (6d).....                                    | 9  |
| (E)-7-(3,7-Dimethylocta-2,6-dienyloxy)-2,3-dihydrocyclopenta[c]chromen-4(1H)-one <sup>1</sup> H NMR spectrum (7a).....                             | 10 |
| 7-(((1R,5S)-6,6-Dimethylbicyclo[3.1.1]hept-2-en-2-yl)methoxy)-2,3-dihydrocyclopenta[c]chromen-4(1H)-one <sup>1</sup> H NMR spectrum (7b) .....     | 11 |
| 7-(((1S,5R)-6,6-Dimethylbicyclo[3.1.1]hept-2-en-2-yl)methoxy)-2,3-dihydrocyclopenta[c]chromen-4(1H)-one <sup>1</sup> H NMR spectrum (7c).....      | 12 |
| 7-(2-((1R,5S)-6,6-Dimethylbicyclo[3.1.1]hept-2-en-2-yl)ethoxy)-2,3-dihydrocyclopenta[c]chromen-4(1H)-one <sup>1</sup> H NMR spectrum (7d) .....    | 13 |
| (E)-3-(3,7-Dimethylocta-2,6-dienyloxy)-7,8,9,10-tetrahydro-6H-benzo[c]chromen-6-one <sup>1</sup> H NMR spectrum (8a).....                          | 14 |
| 3-(((1R,5S)-6,6-Dimethylbicyclo[3.1.1]hept-2-en-2-yl)methoxy)-7,8,9,10-tetrahydro-6H-benzo[c]chromen-6-one <sup>1</sup> H NMR spectrum (8b) .....  | 15 |
| 3-(((1S,5R)-6,6-Dimethylbicyclo[3.1.1]hept-2-en-2-yl)methoxy)-7,8,9,10-tetrahydro-6H-benzo[c]chromen-6-one <sup>1</sup> H NMR spectrum (8c) .....  | 16 |
| 3-(2-((1R,5S)-6,6-Dimethylbicyclo[3.1.1]hept-2-en-2-yl)ethoxy)-7,8,9,10-tetrahydro-6H-benzo[c]chromen-6-one <sup>1</sup> H NMR spectrum (8d) ..... | 17 |
| (E)-7-(3,7-Dimethylocta-2,6-dienyloxy)-4-phenyl-2H-chromen-2-one <sup>1</sup> H NMR spectrum (9a) .                                                | 18 |
| 7-(((1R,5S)-6,6-Dimethylbicyclo[3.1.1]hept-2-en-2-yl)methoxy)-4-phenyl-2H-chromen-2-one <sup>1</sup> H NMR spectrum (9b) .....                     | 19 |
| 7-(((1S,5R)-6,6-Dimethylbicyclo[3.1.1]hept-2-en-2-yl)methoxy)-4-phenyl-2H-chromen-2-one <sup>1</sup> H NMR spectrum (9c).....                      | 20 |
| 7-(2-((1R,5S)-6,6-dimethylbicyclo[3.1.1]hept-2-en-2-yl)ethoxy)-4-phenyl-2H-chromen-2-one <sup>1</sup> H NMR spectrum (9d).....                     | 21 |

|                                                                                                                                            |    |
|--------------------------------------------------------------------------------------------------------------------------------------------|----|
| (E)-7-(3,7-Dimethylocta-2,6-dienyloxy)-4-(4-fluorophenyl)-2H-chromen-2-one <sup>1</sup> H NMR spectrum (10a) .....                         | 22 |
| 7-(((1R,5S)-6,6-Dimethylbicyclo[3.1.1]hept-2-en-2-yl)methoxy)-4-(4-fluorophenyl)-2H-chromen-2-one <sup>1</sup> H NMR spectrum (10b) .....  | 23 |
| 7-(((1S,5R)-6,6-Dimethylbicyclo[3.1.1]hept-2-en-2-yl)methoxy)-4-(4-fluorophenyl)-2H-chromen-2-one <sup>1</sup> H NMR spectrum (10c) .....  | 24 |
| 7-(2-((1R,5S)-6,6-Dimethylbicyclo[3.1.1]hept-2-en-2-yl)ethoxy)-4-(4-fluorophenyl)-2H-chromen-2-one <sup>1</sup> H NMR spectrum (10d) ..... | 25 |
| Results of the OGTT-1 .....                                                                                                                | 26 |
| Results of the OGTT-2.....                                                                                                                 | 26 |

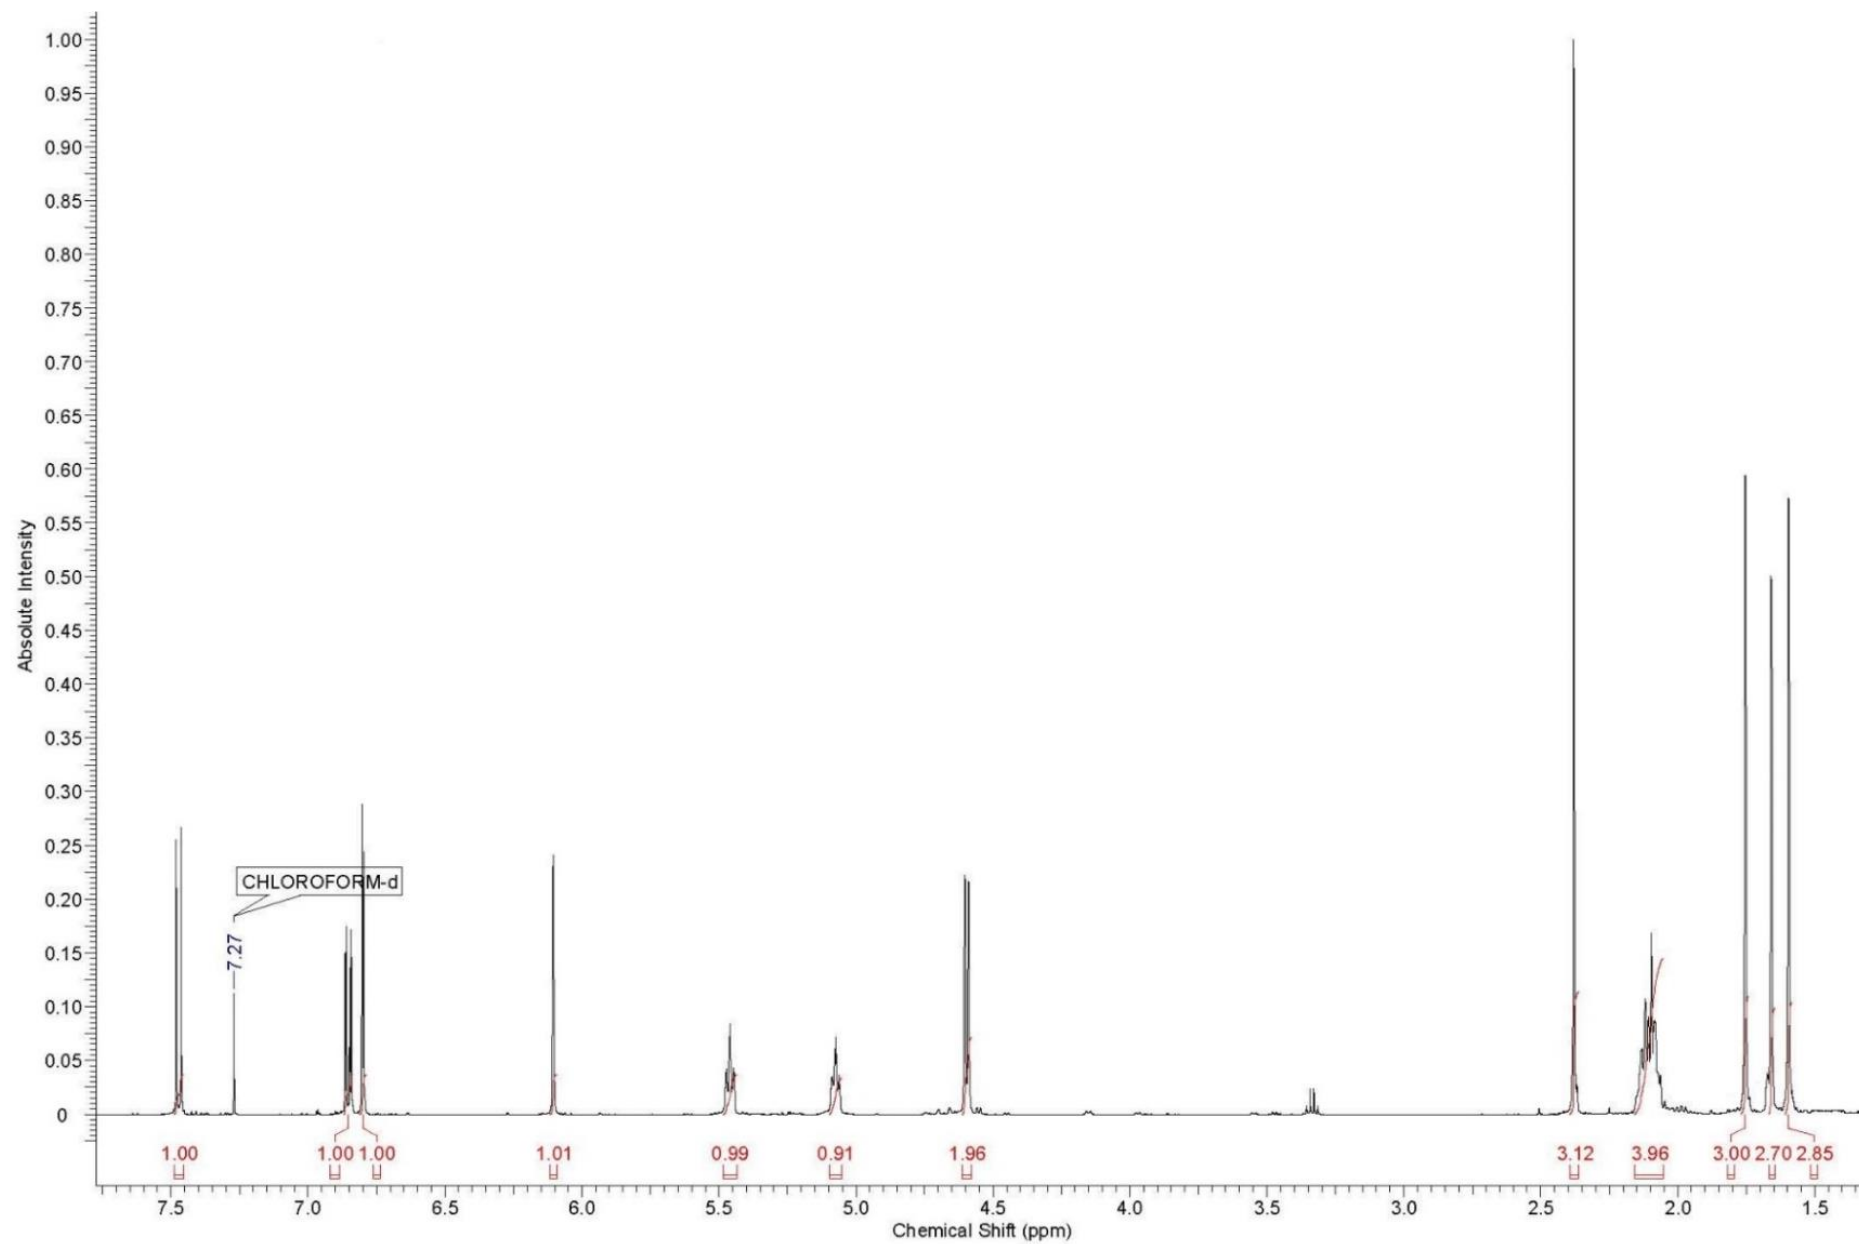

**Figure S1.** (E)-7-(3,7-Dimethylocta-2,6-dienyloxy)-4-methyl-2H-chromen-2-one  $^1\text{H}$  NMR spectrum (6a).

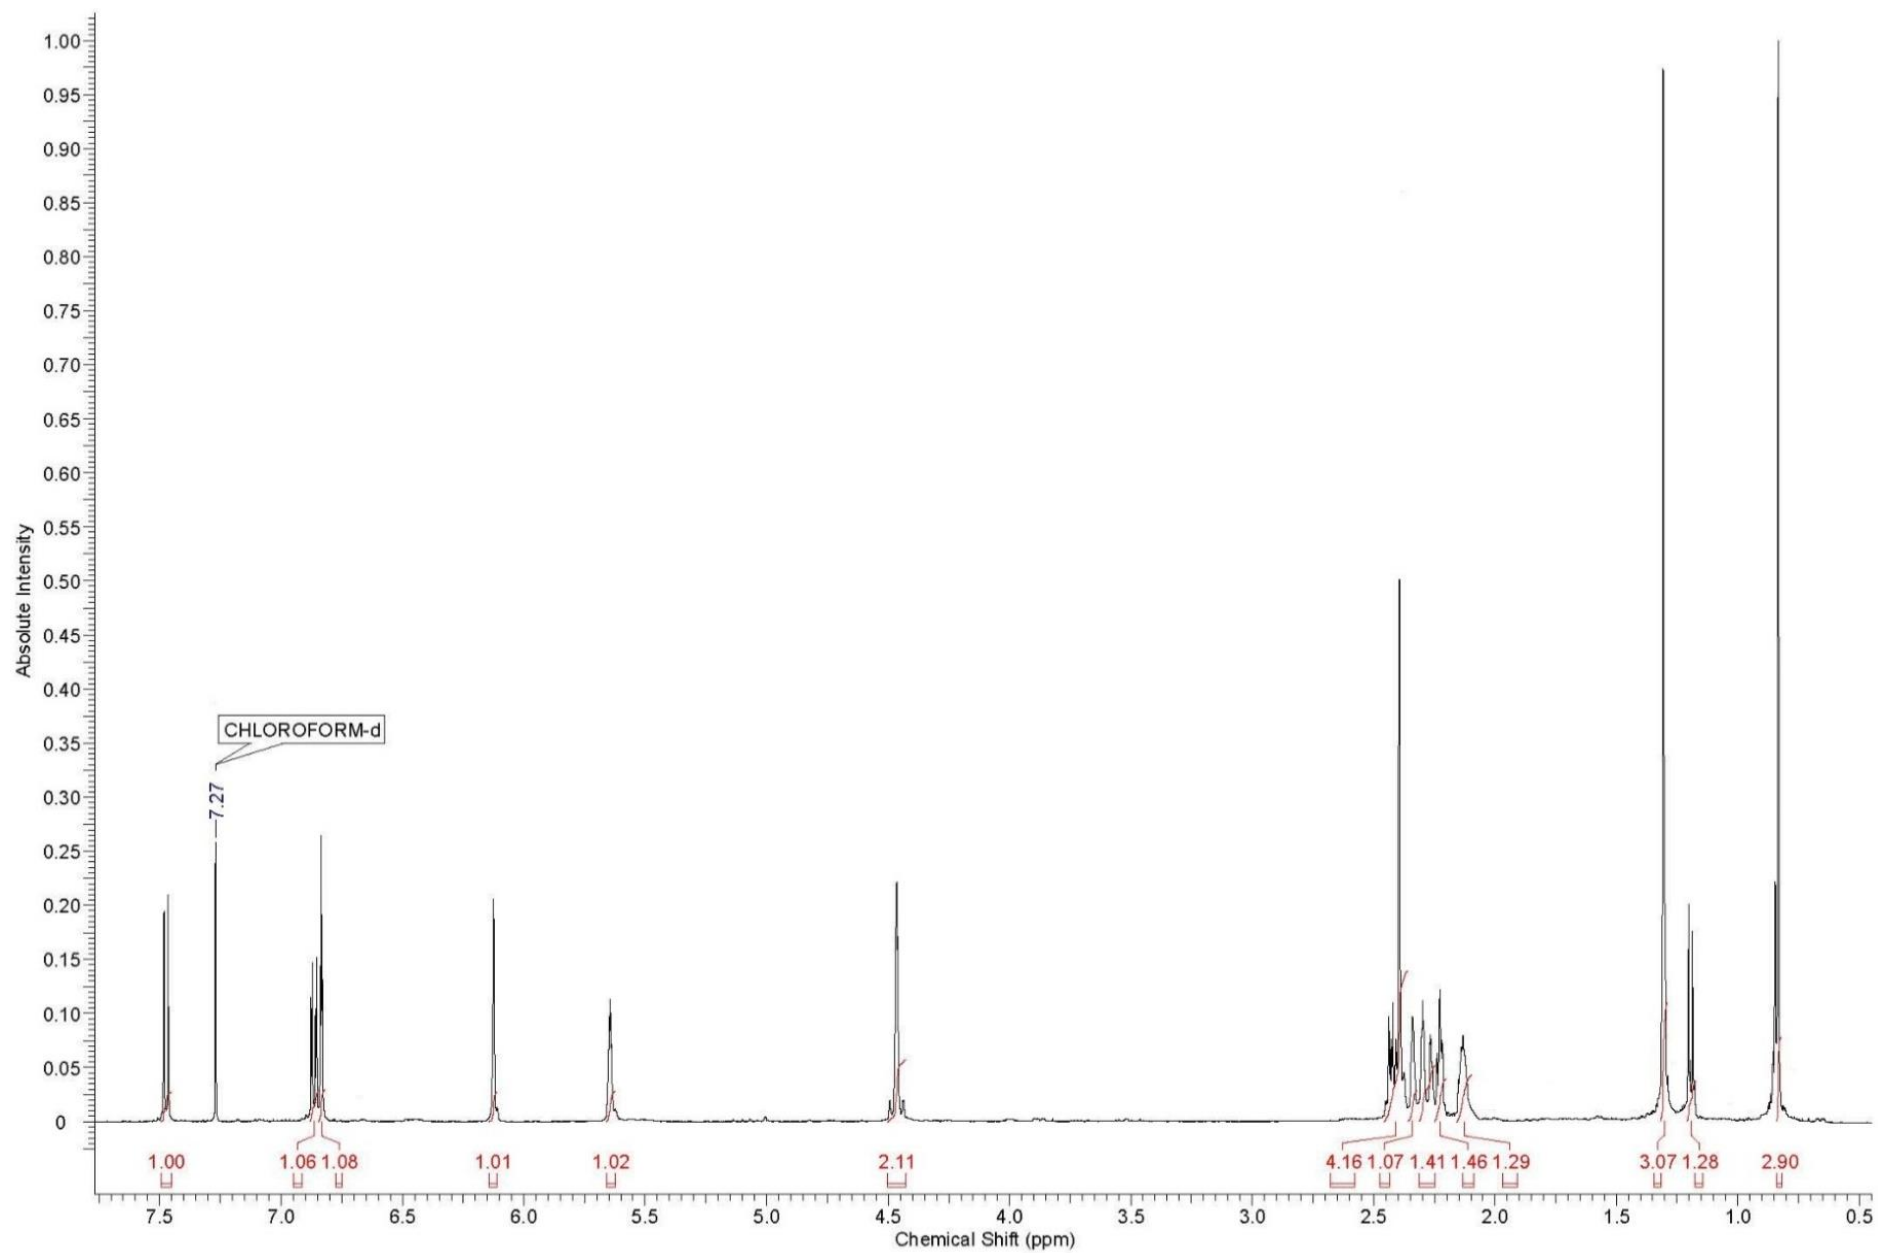

**Figure S2.** 7-(((1R,5S)-6,6-Dimethylbicyclo[3.1.1]hept-2-en-2-yl)methoxy)-4-methyl-2H-chromen-2-one <sup>1</sup>H NMR spectrum (6b).

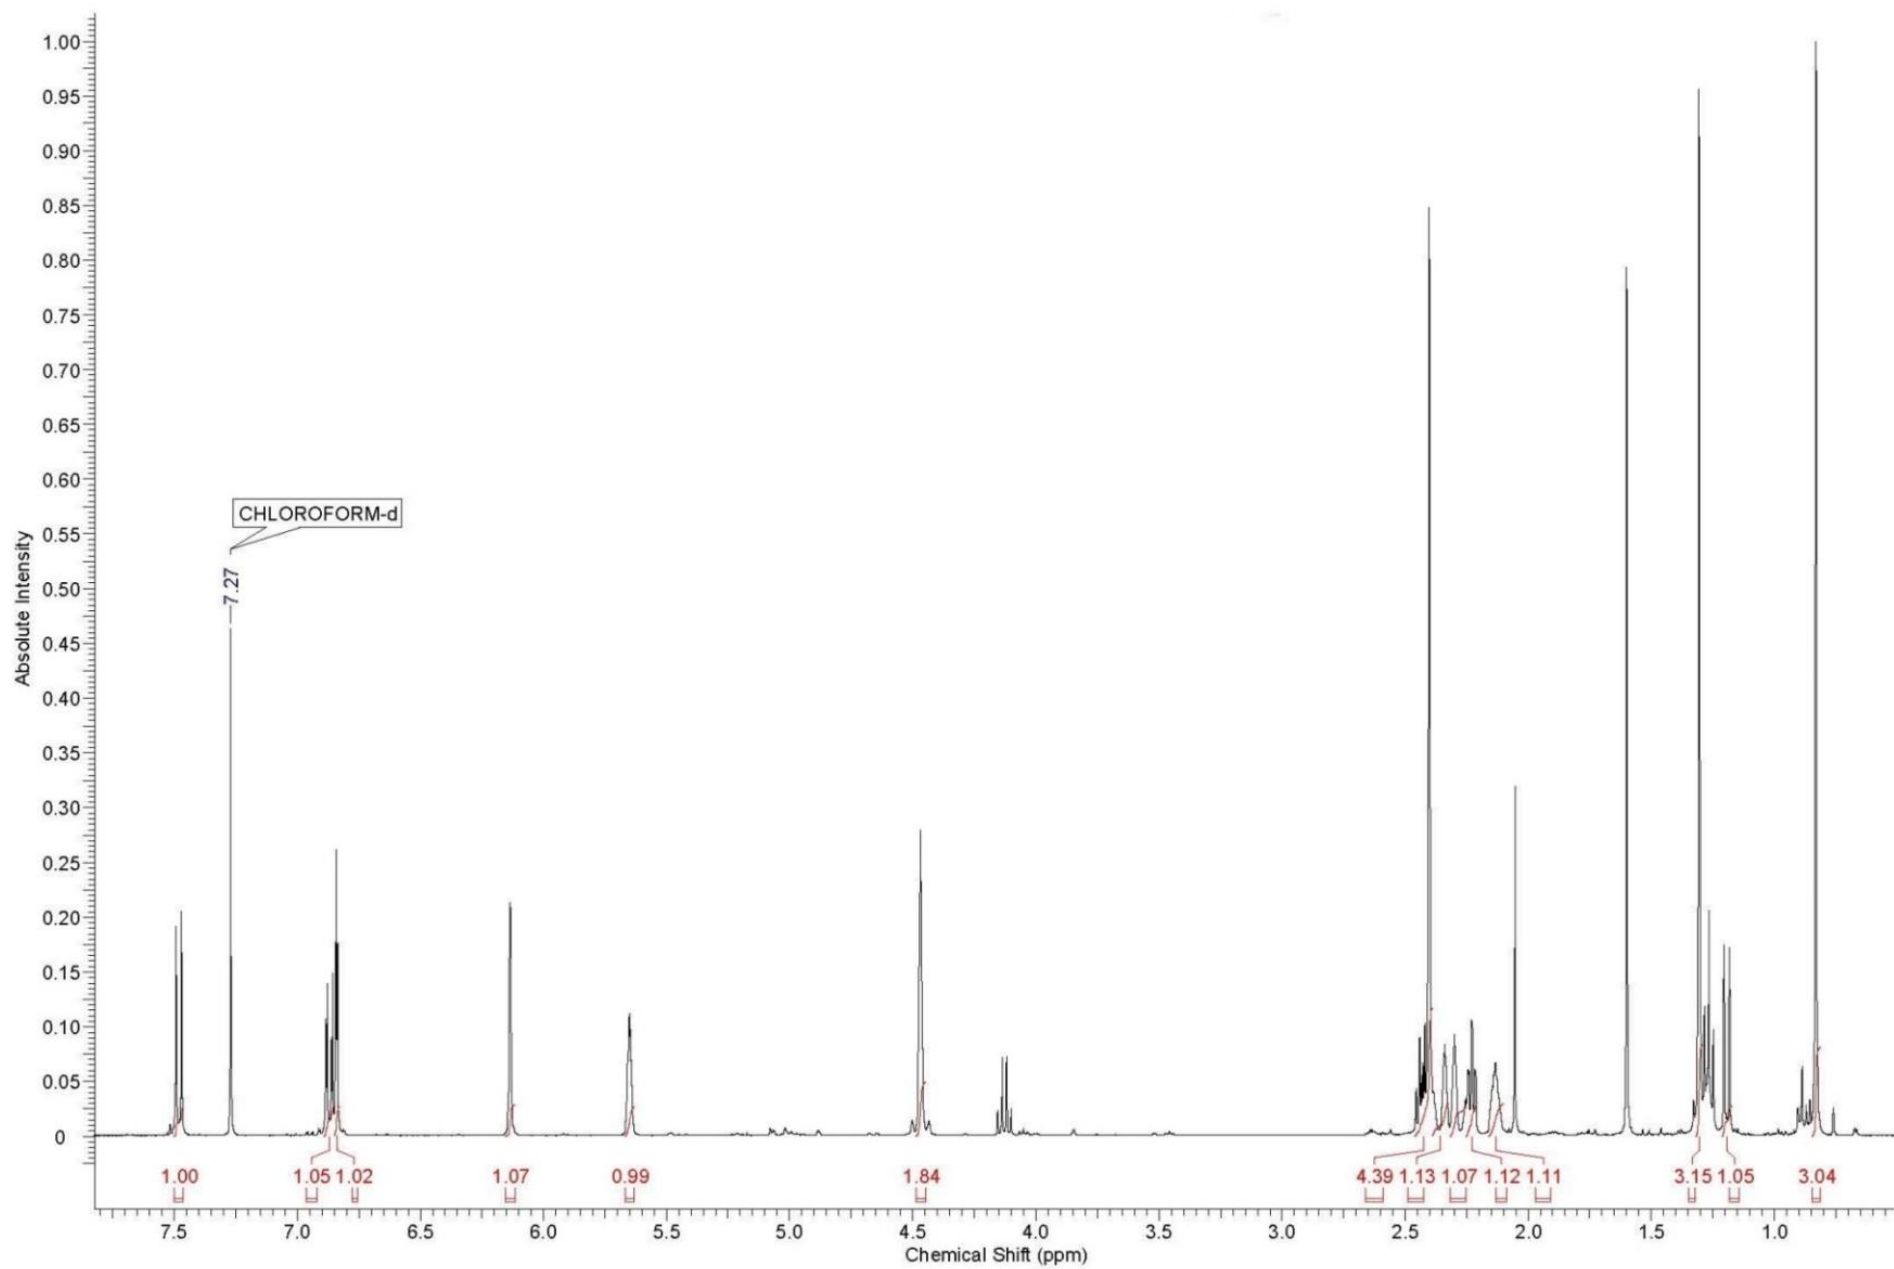

**Figure S3.** 7-(((1S,5R)-6,6-Dimethylbicyclo[3.1.1]hept-2-en-2-yl)methoxy)-4-methyl-2H-chromen-2-one <sup>1</sup>H NMR spectrum (6c).

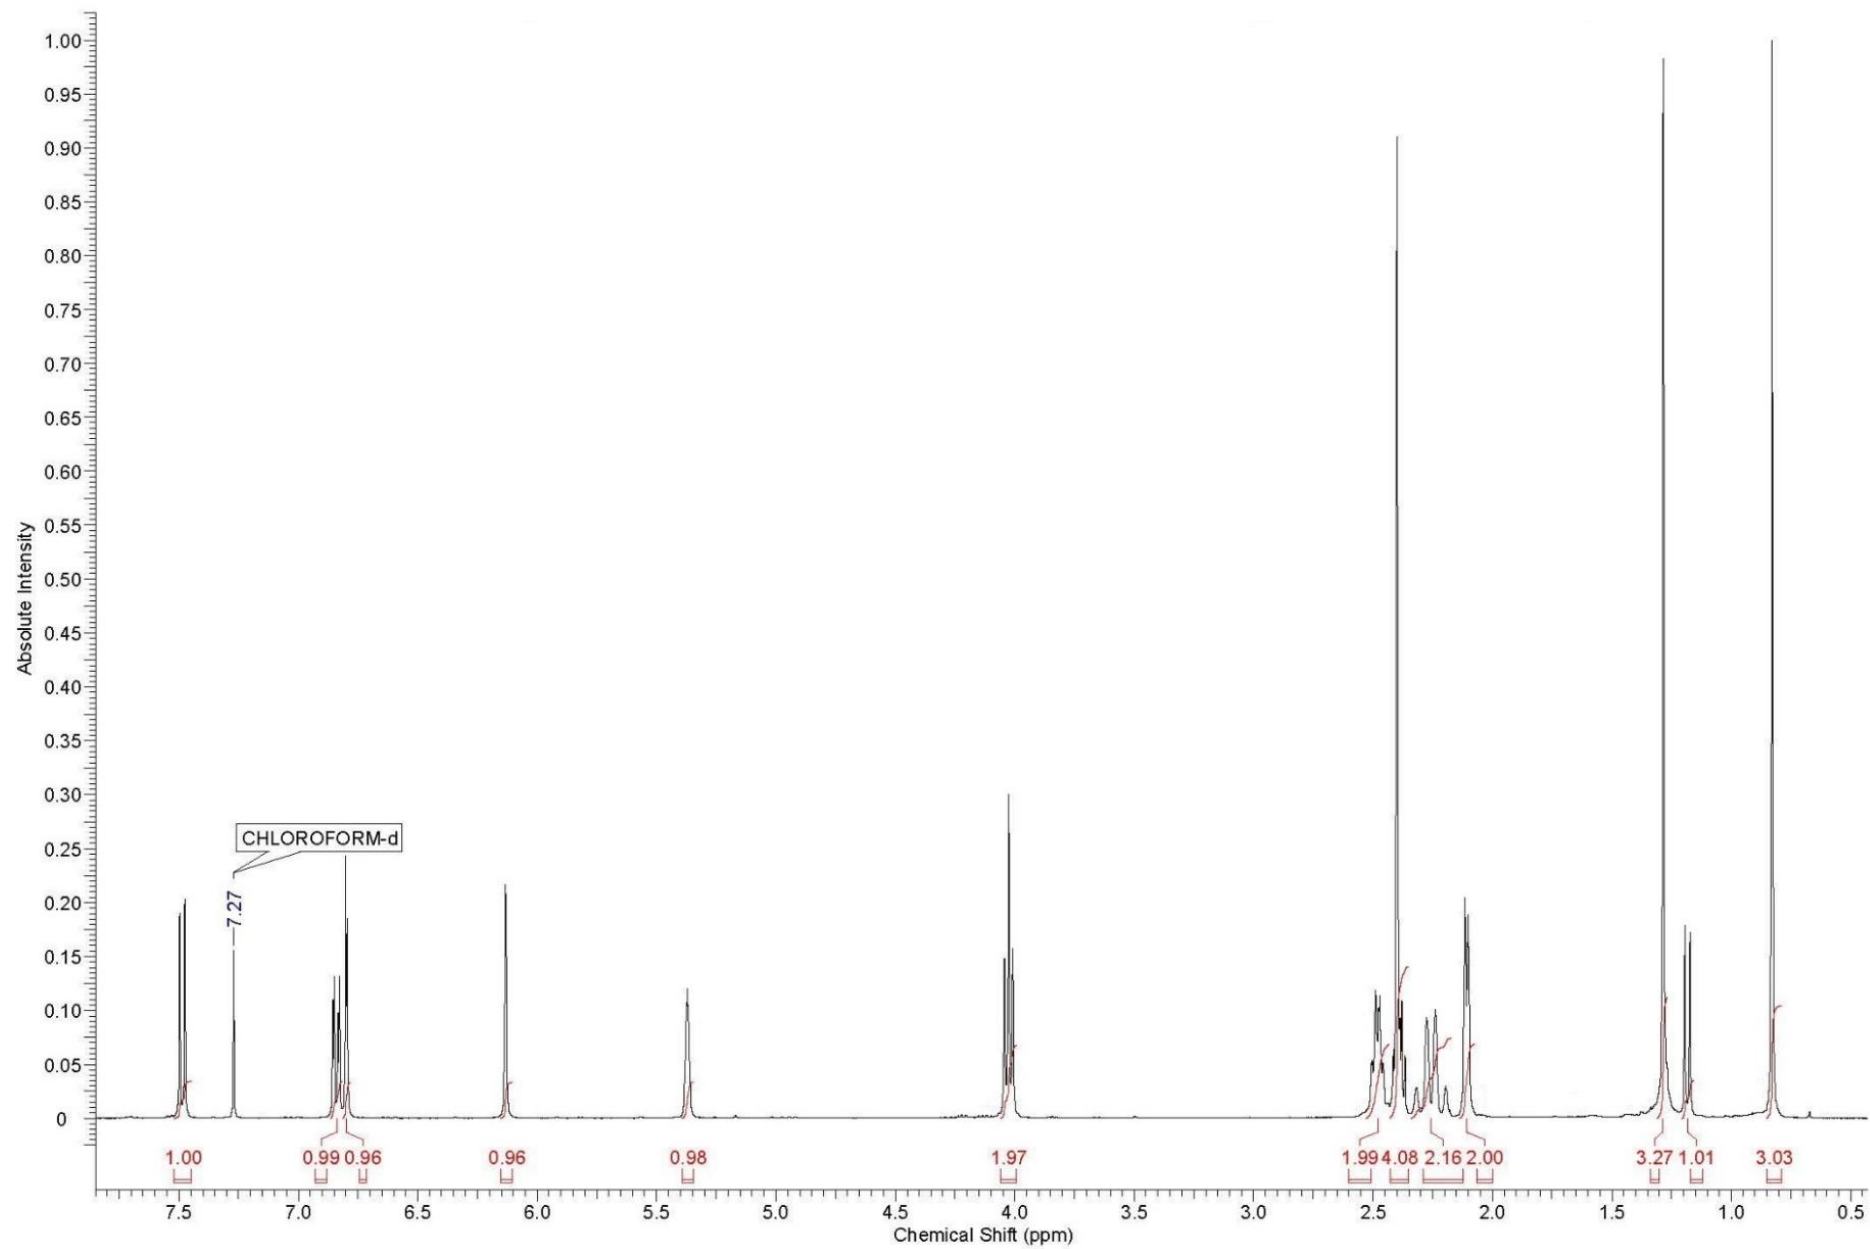

**Figure S4.** 7-(2-((1R,5S)-6,6-Dimethylbicyclo[3.1.1]hept-2-en-2-yl)ethoxy)-4-methyl-2H-chromen-2-one <sup>1</sup>H NMR spectrum (6d).

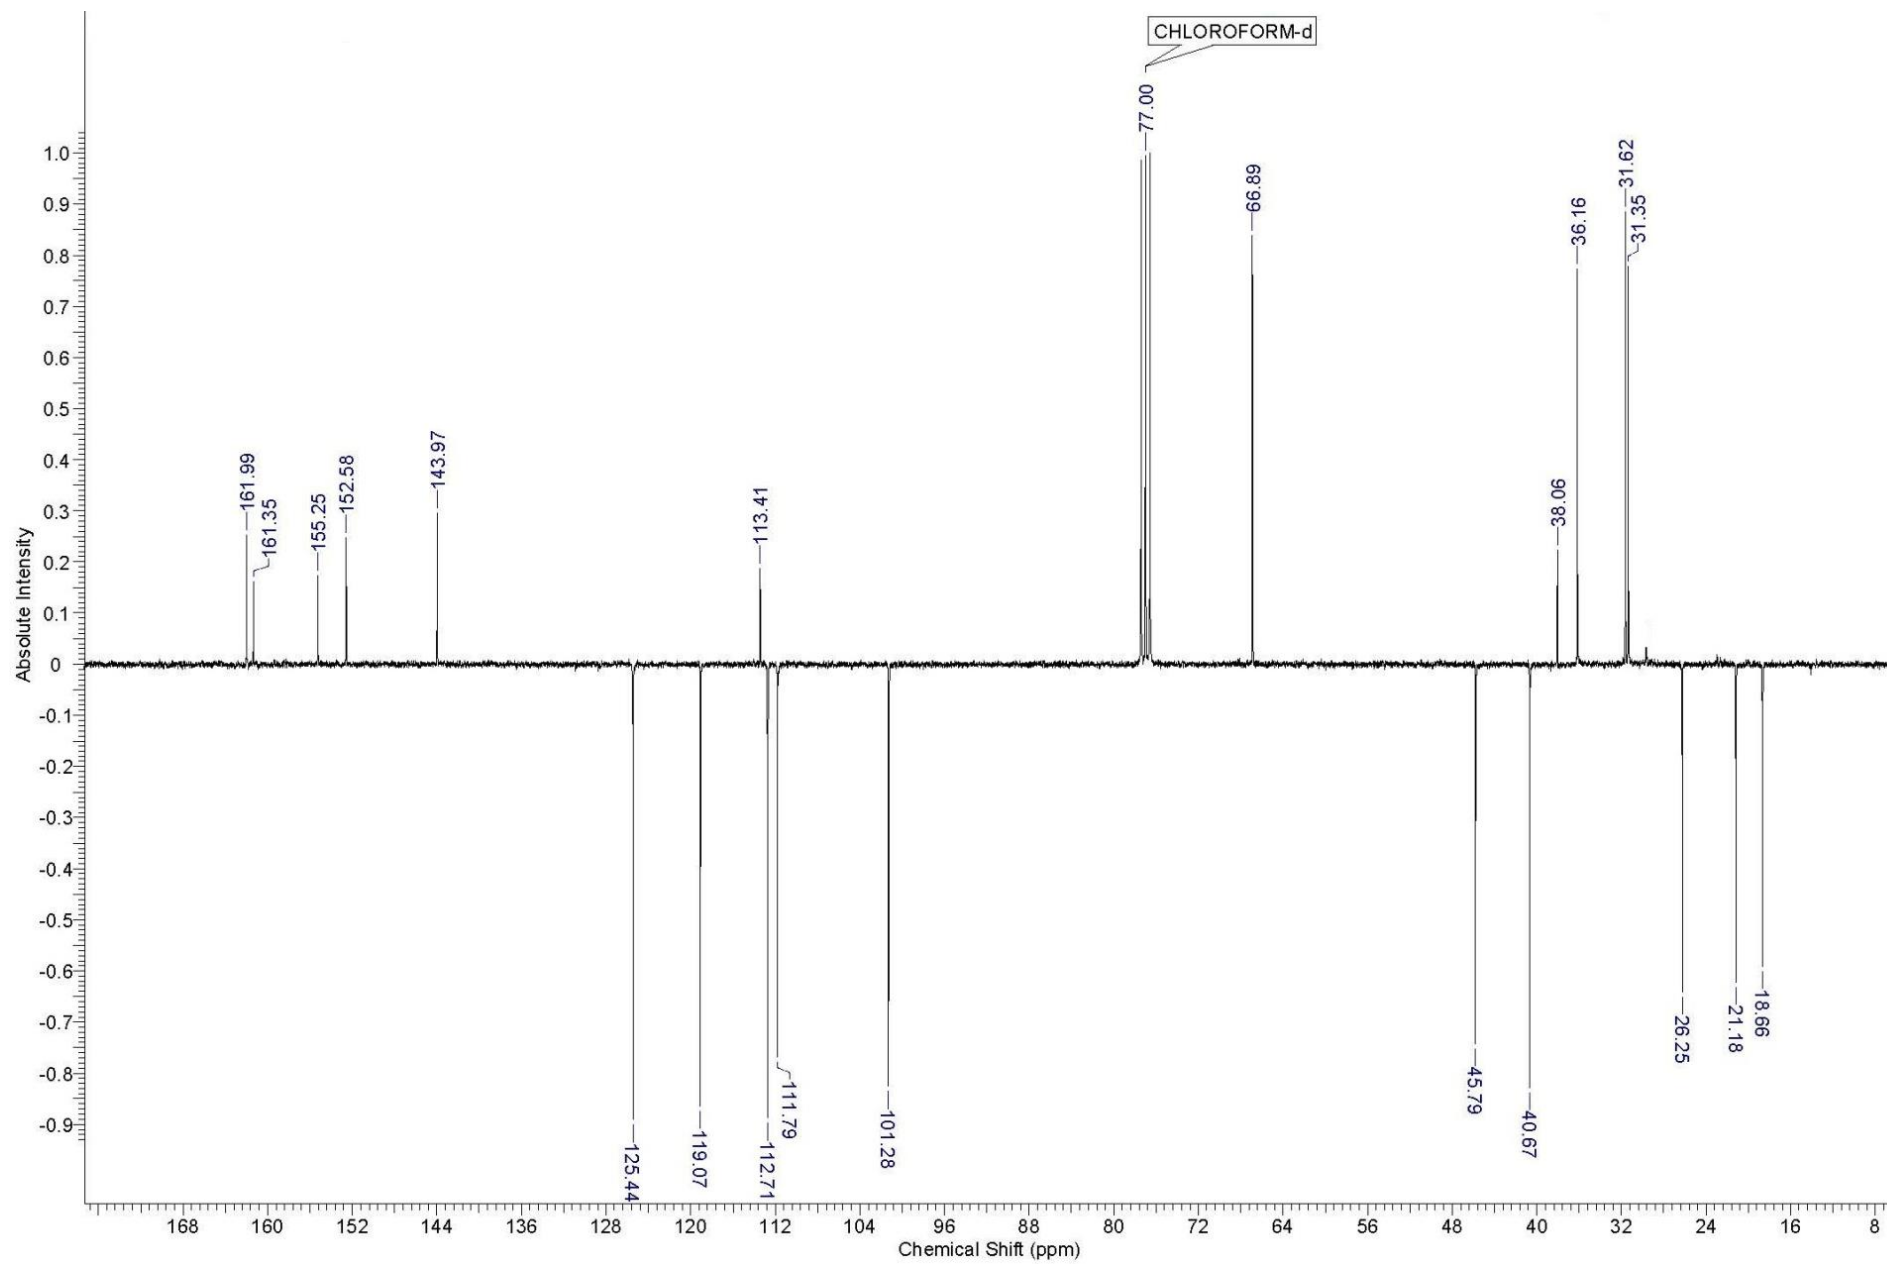

Figure S5. 7-((1R,5S)-6,6-Dimethylbicyclo[3.1.1]hept-2-en-2-yl)ethoxy)-4-methyl-2H-chromen-2-one <sup>13</sup>C NMR spectrum (6d).



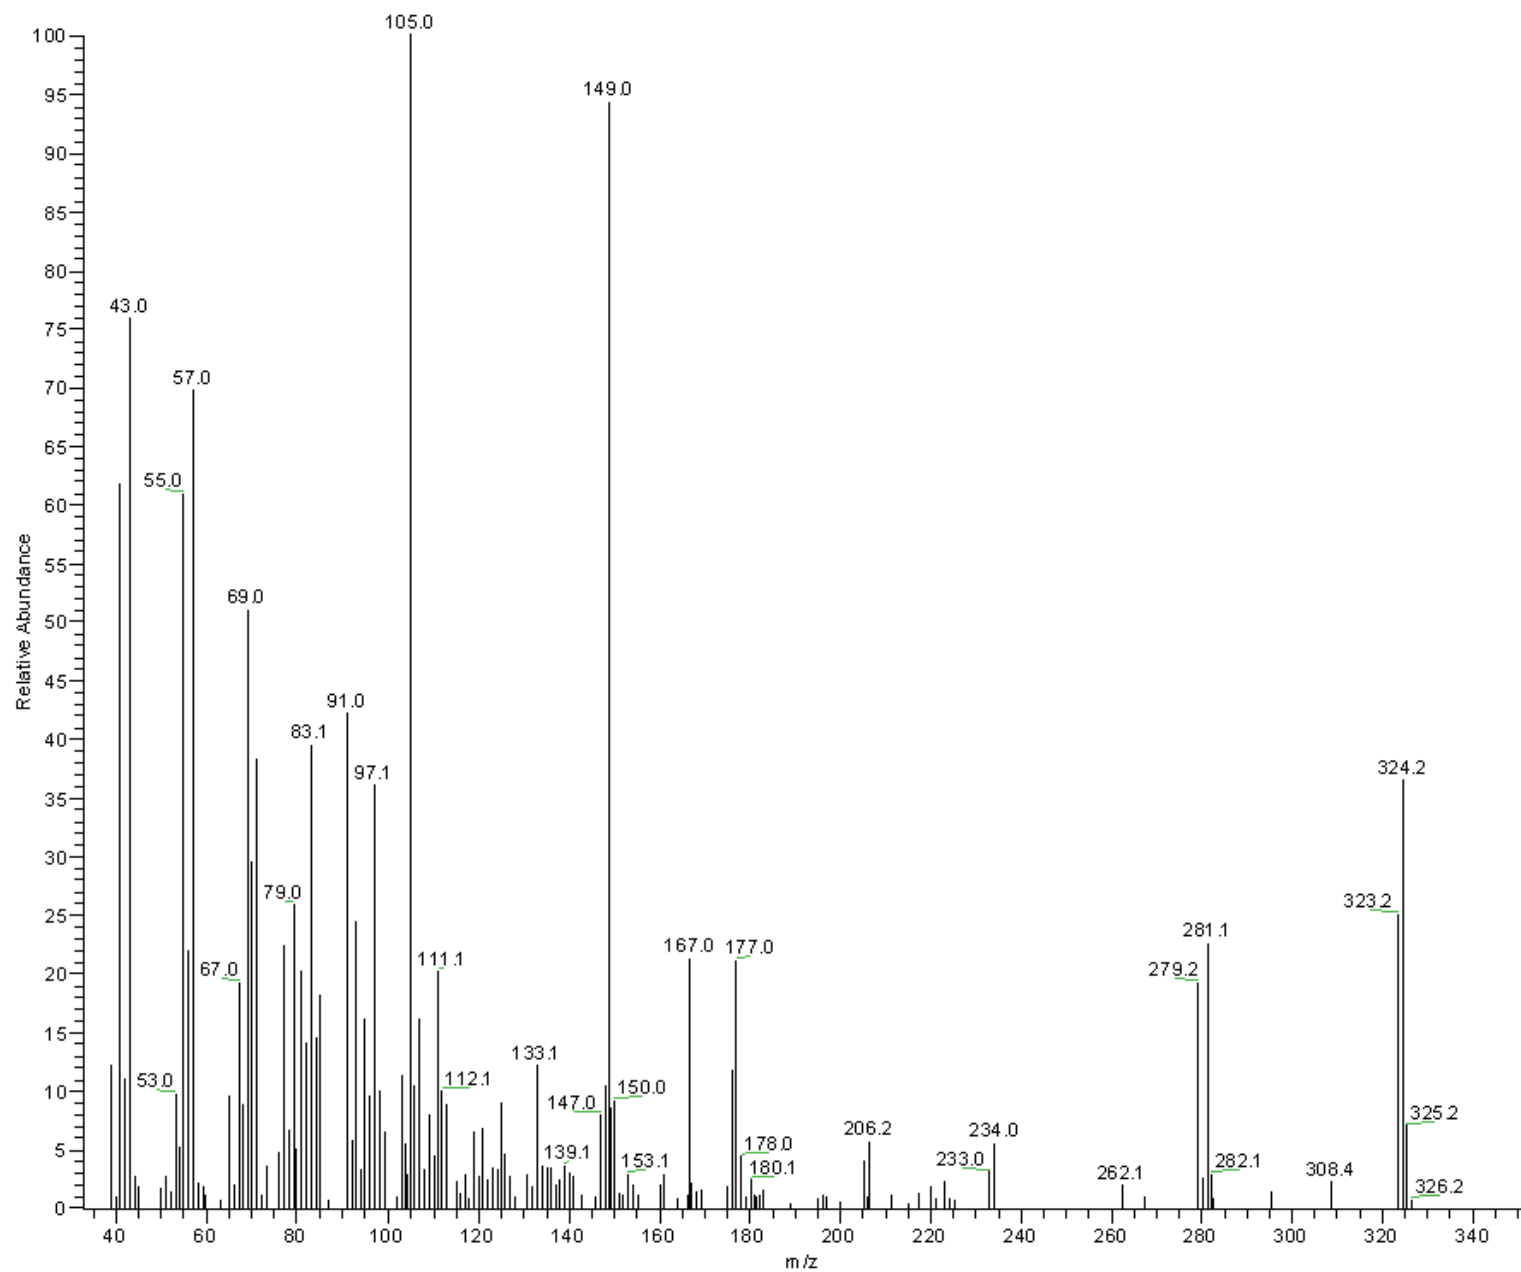

**Figure S6.** 7-(2-((1R,5S)-6,6-Dimethylbicyclo[3.1.1]hept-2-en-2-yl)ethoxy)-4-methyl-2H-chromen-2-one HRMS spectra (6d).

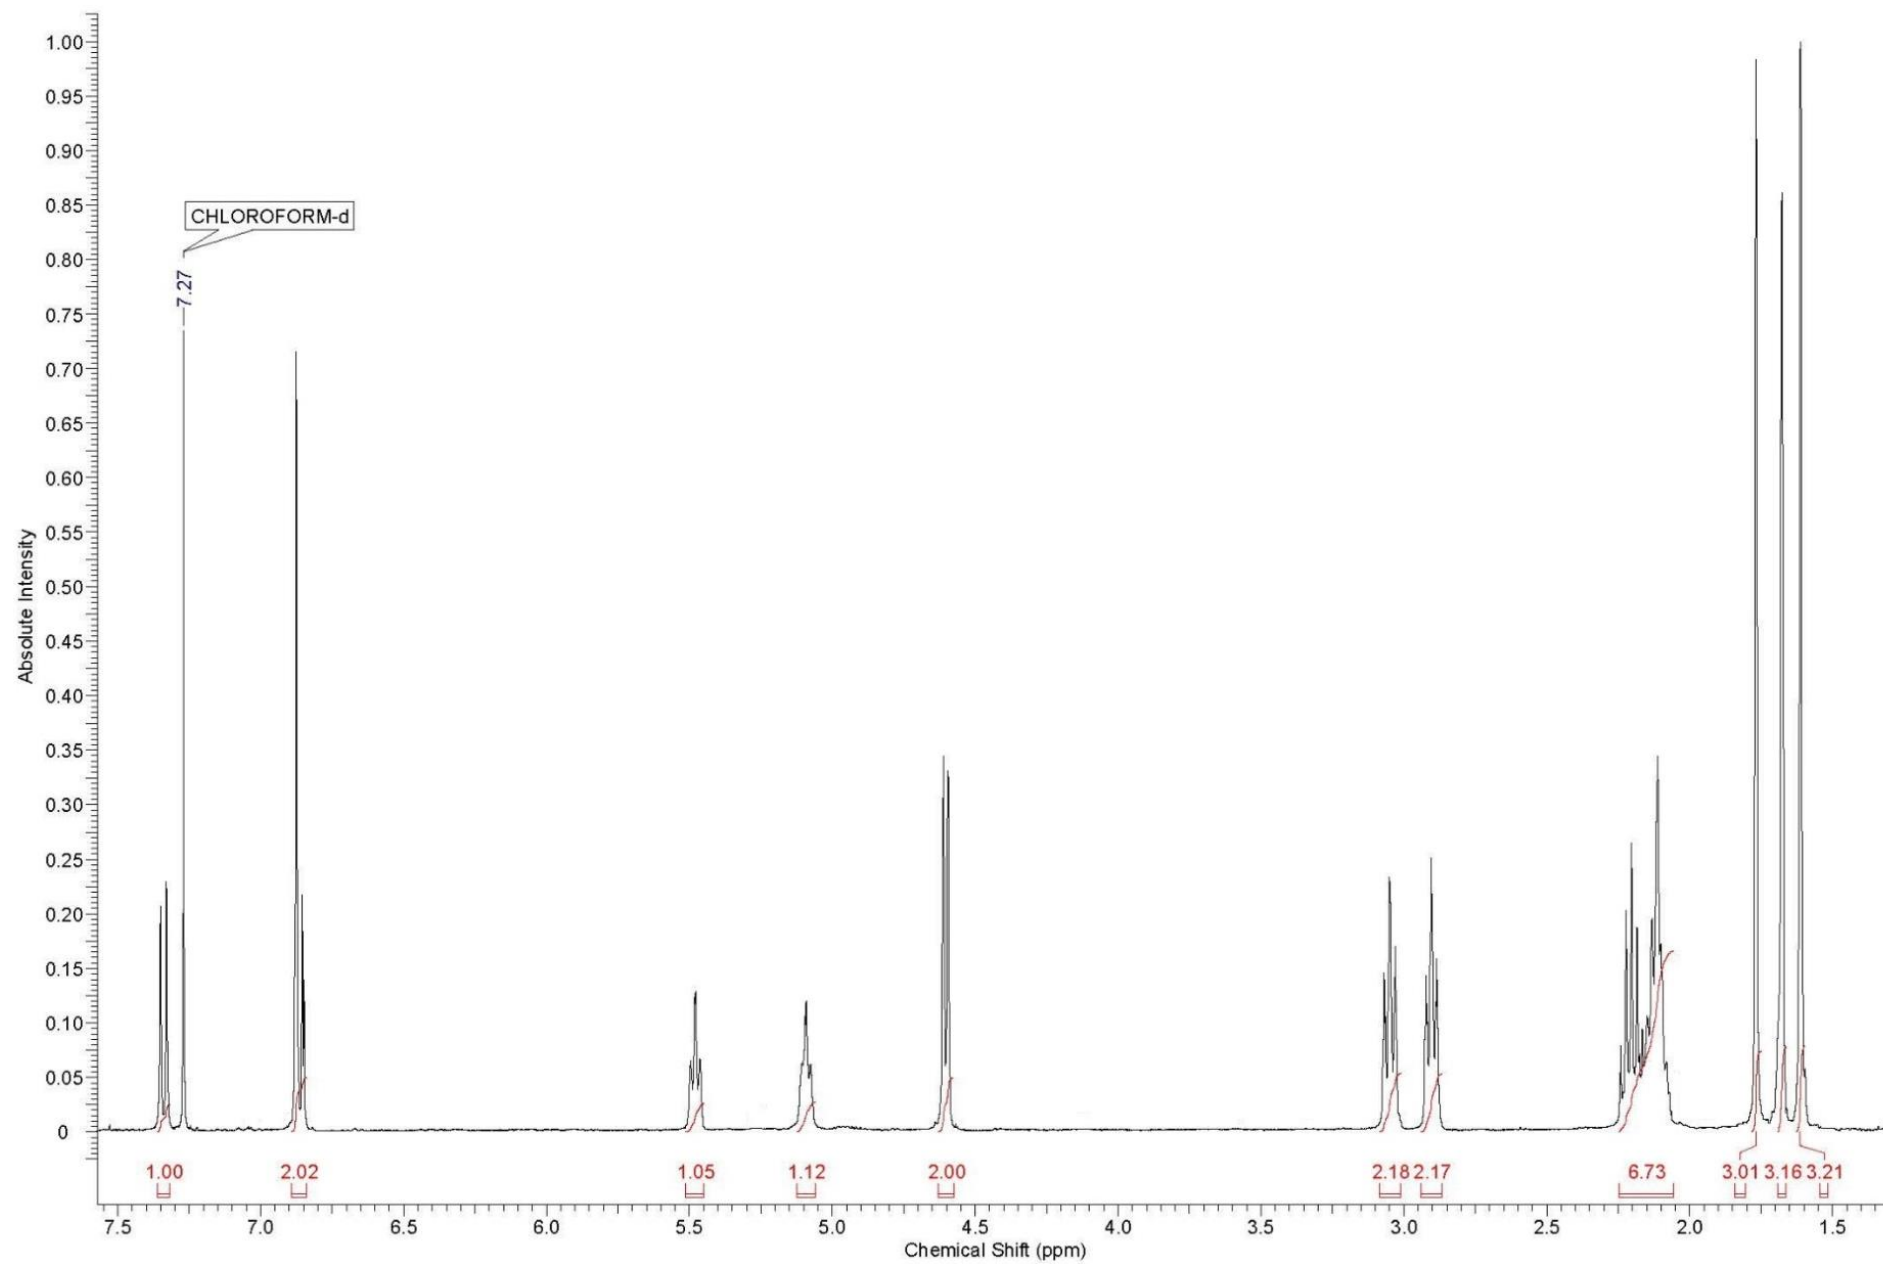

**Figure S7.** (E)-7-(3,7-Dimethylocta-2,6-dienyloxy)-2,3-dihydrocyclopenta[c]chromen-4(1H)-one <sup>1</sup>H NMR spectrum (7a).

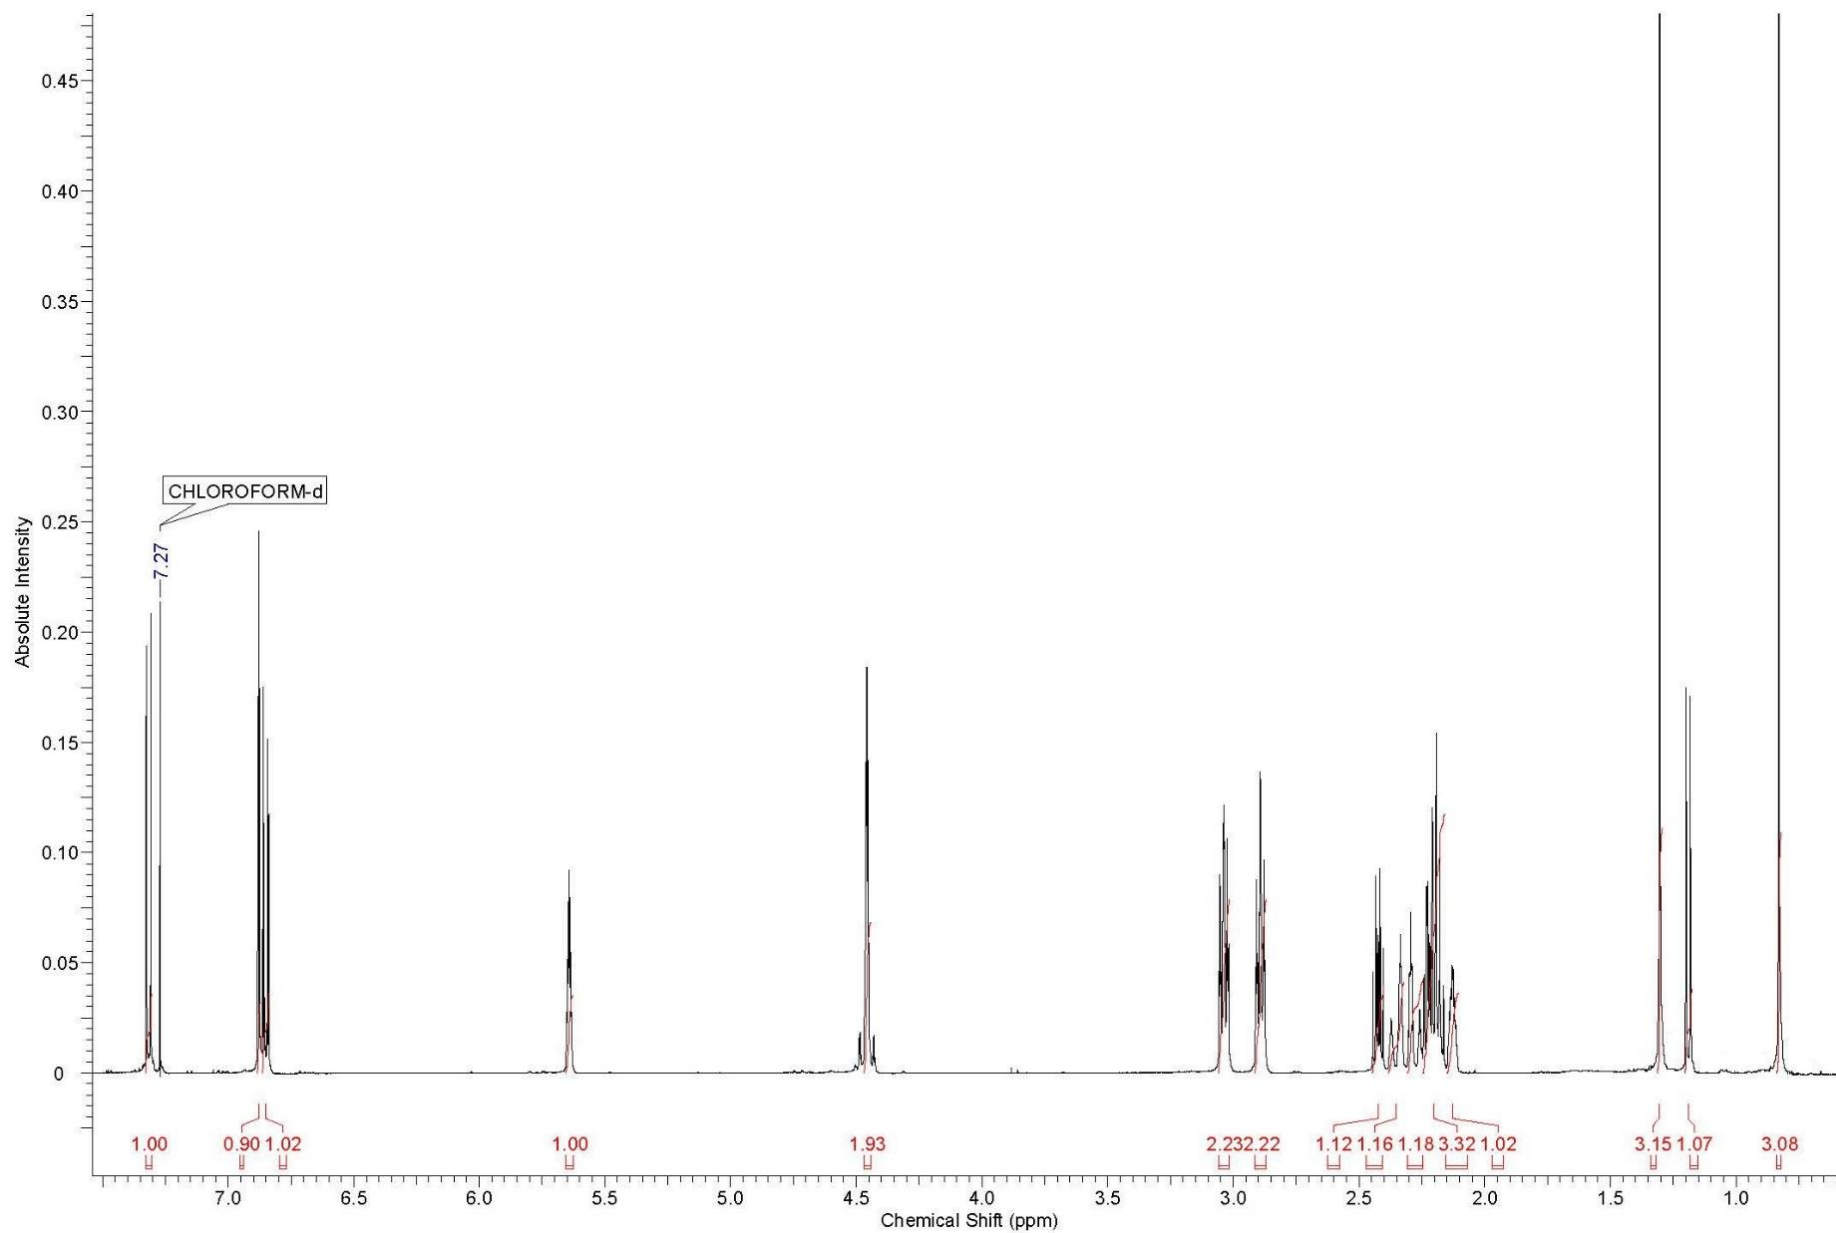

Figure S8. 7-(((1R,5S)-6,6-Dimethylbicyclo[3.1.1]hept-2-en-2-yl)methoxy)-2,3-dihydrocyclopenta[c]chromen-4(1H)-one 1H NMR spectrum (7b).

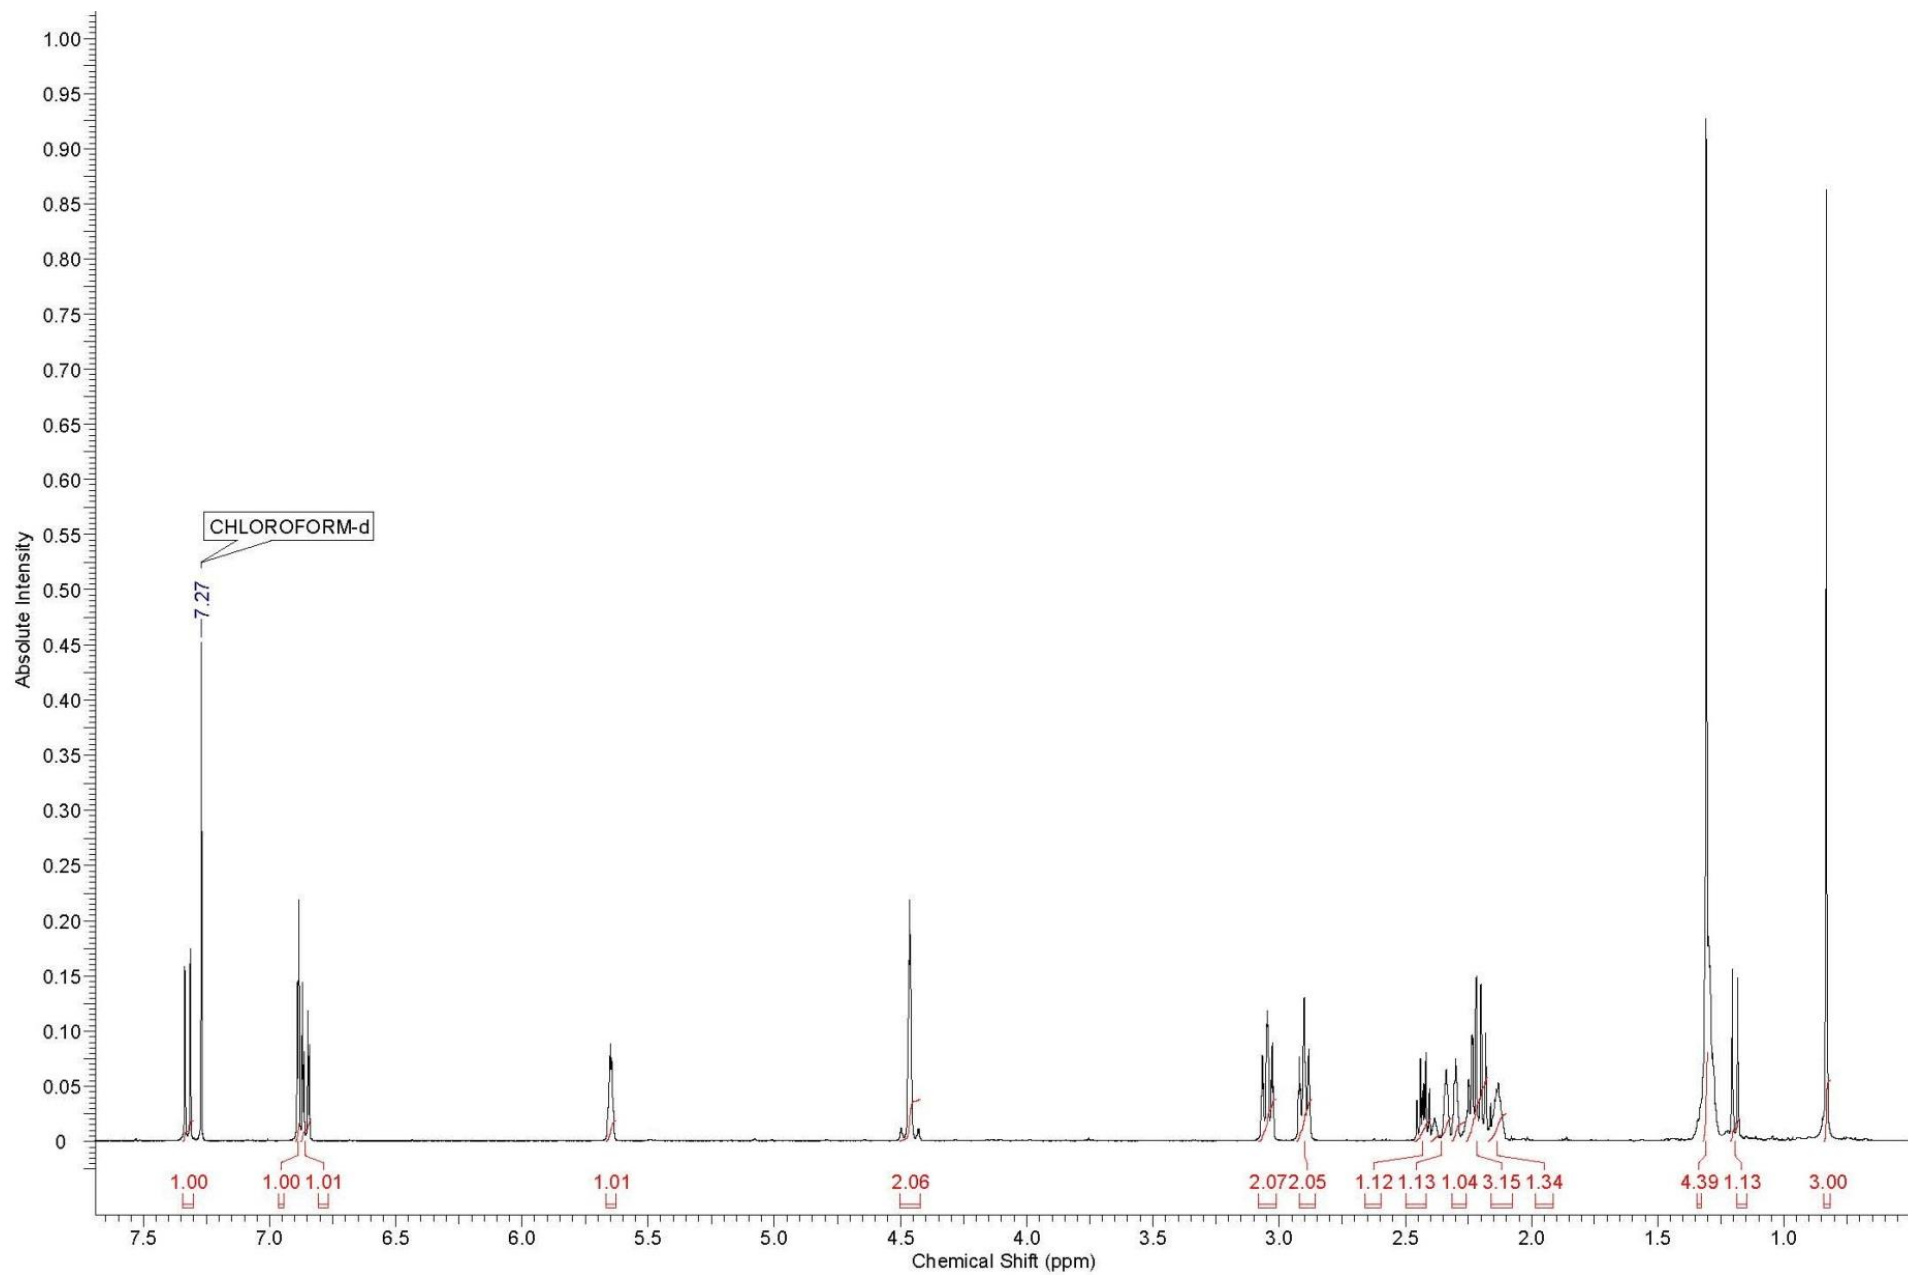

**Figure S9.** 7-(((1S,5R)-6,6-Dimethylbicyclo[3.1.1]hept-2-en-2-yl)methoxy)-2,3-dihydrocyclopenta[c]chromen-4(1H)-one <sup>1</sup>H NMR spectrum (7c).

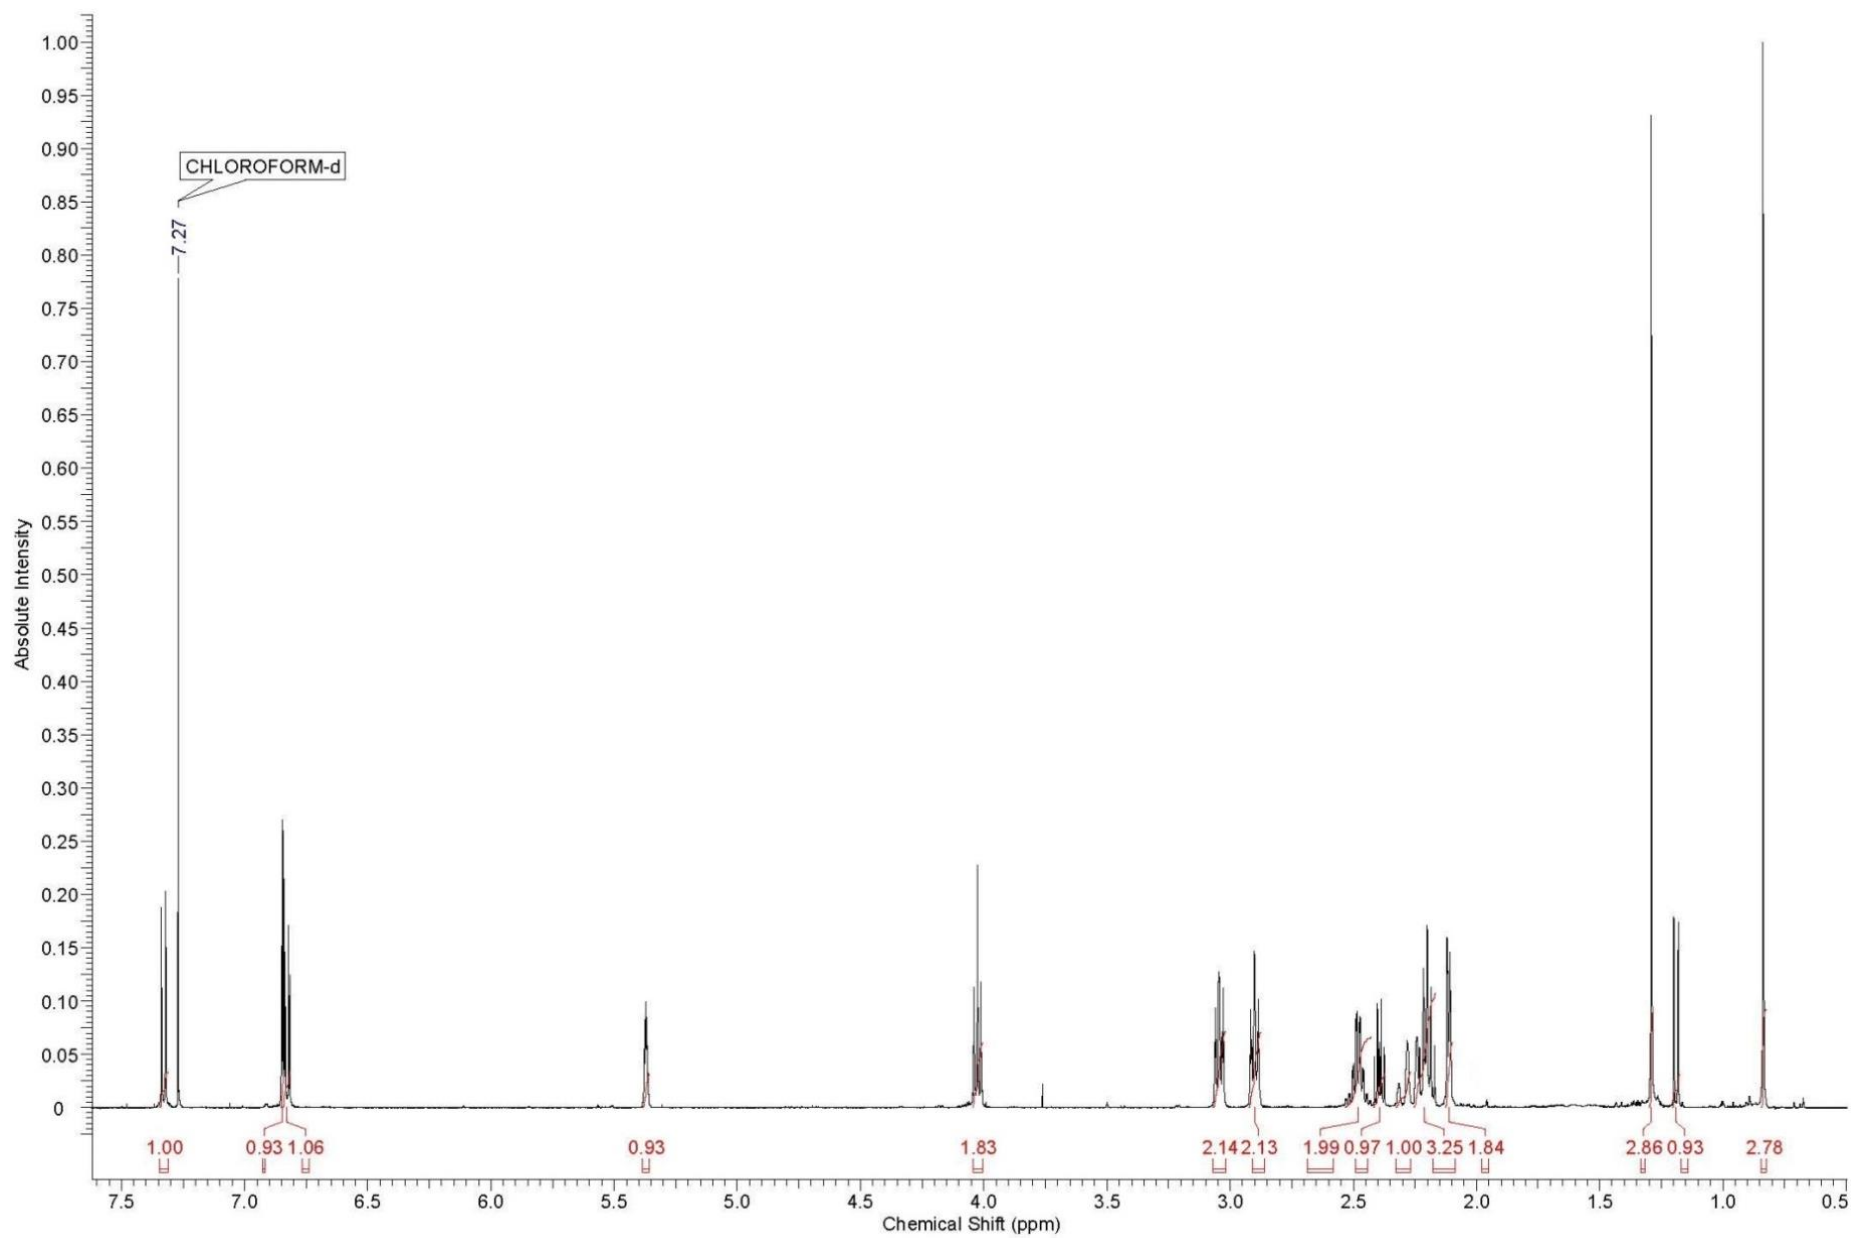

**Figure S10.** 7-(2-((1R,5S)-6,6-Dimethylbicyclo[3.1.1]hept-2-en-2-yl)ethoxy)-2,3-dihydrocyclopenta[c]chromen-4(1H)-one <sup>1</sup>H NMR spectrum (7d).

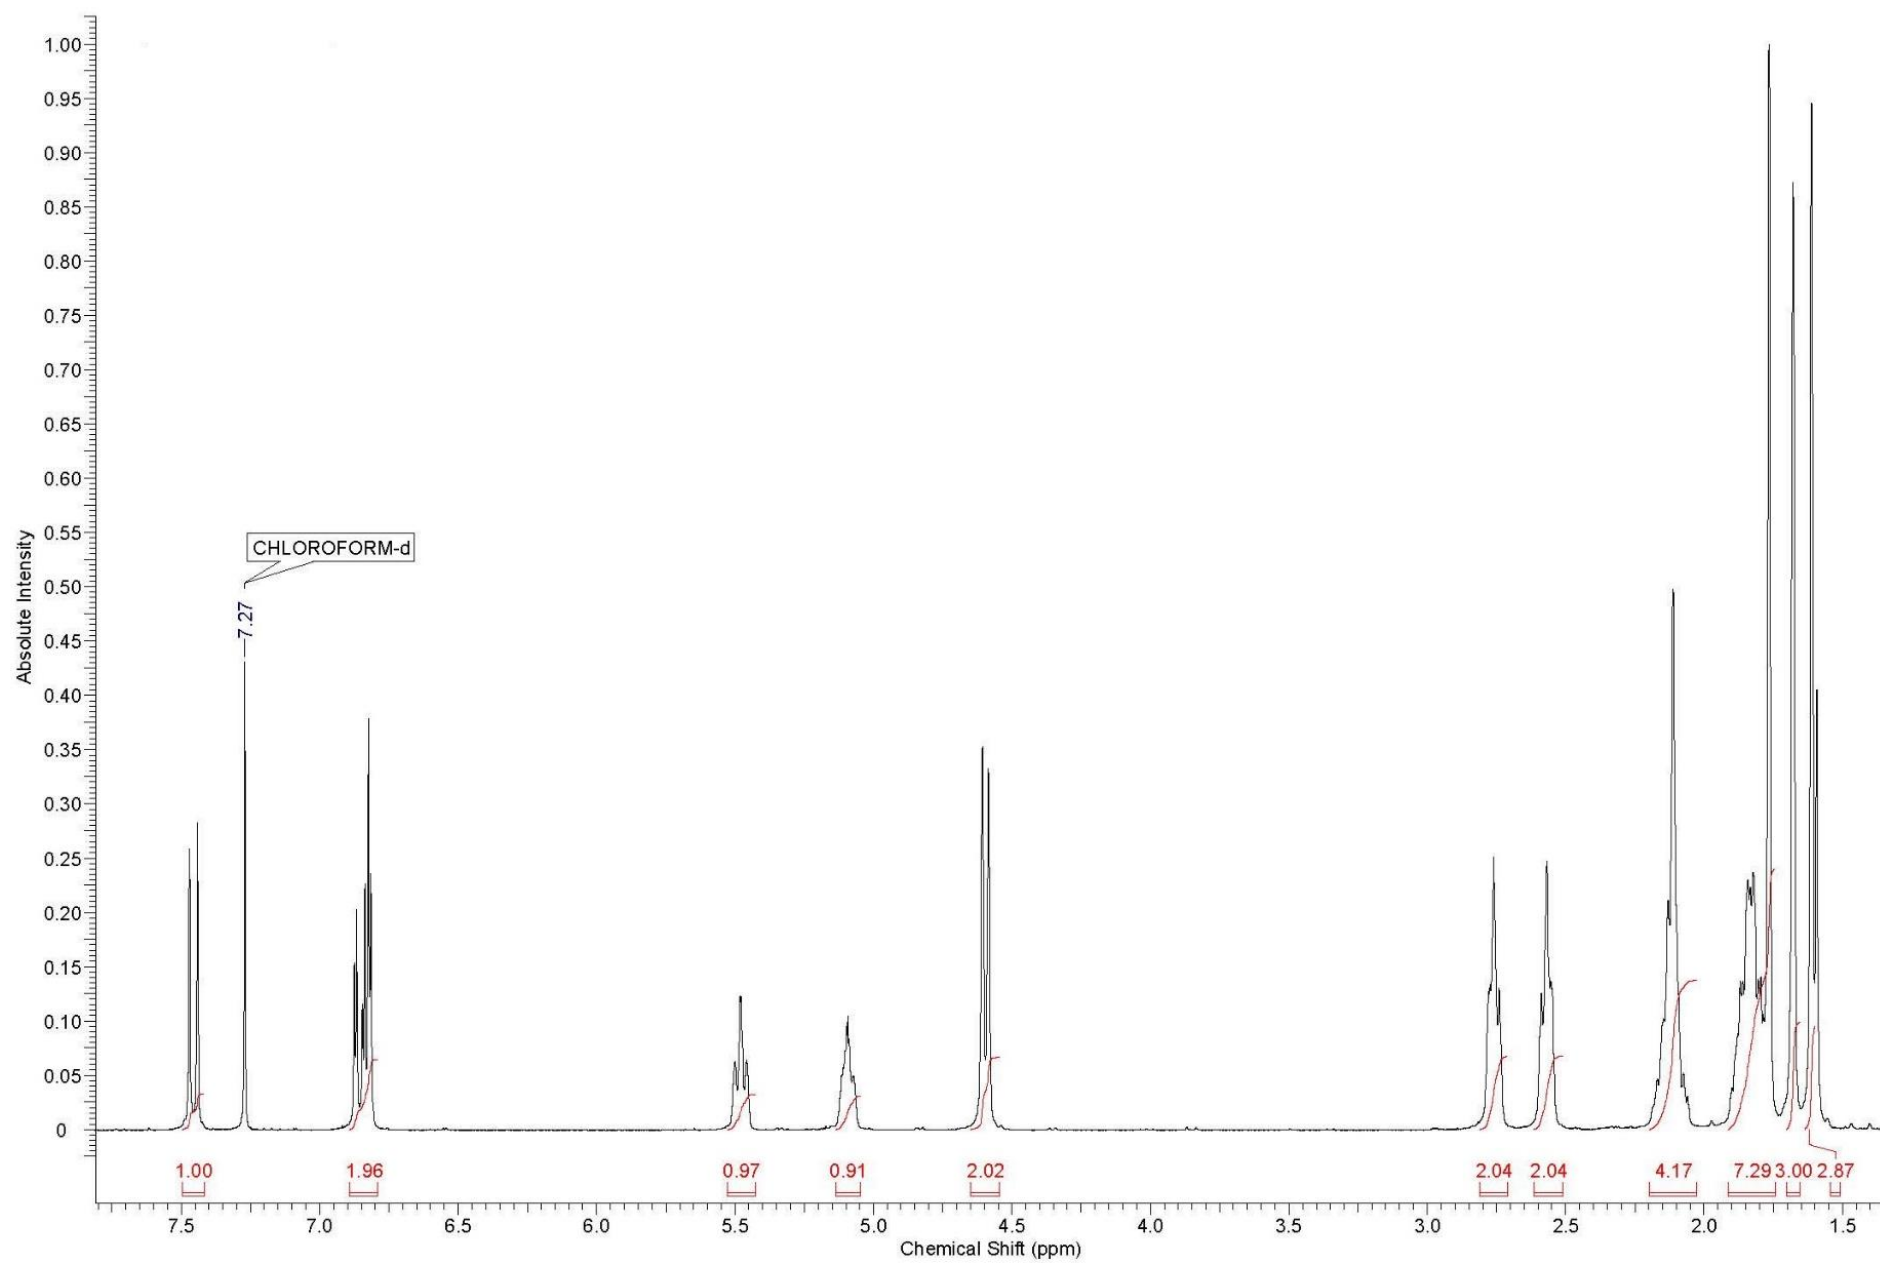

**Figure S11.** (E)-3-(3,7-Dimethylocta-2,6-dienyloxy)-7,8,9,10-tetrahydro-6H-benzo[c]chromen-6-one  $^1\text{H}$  NMR spectrum (8a).

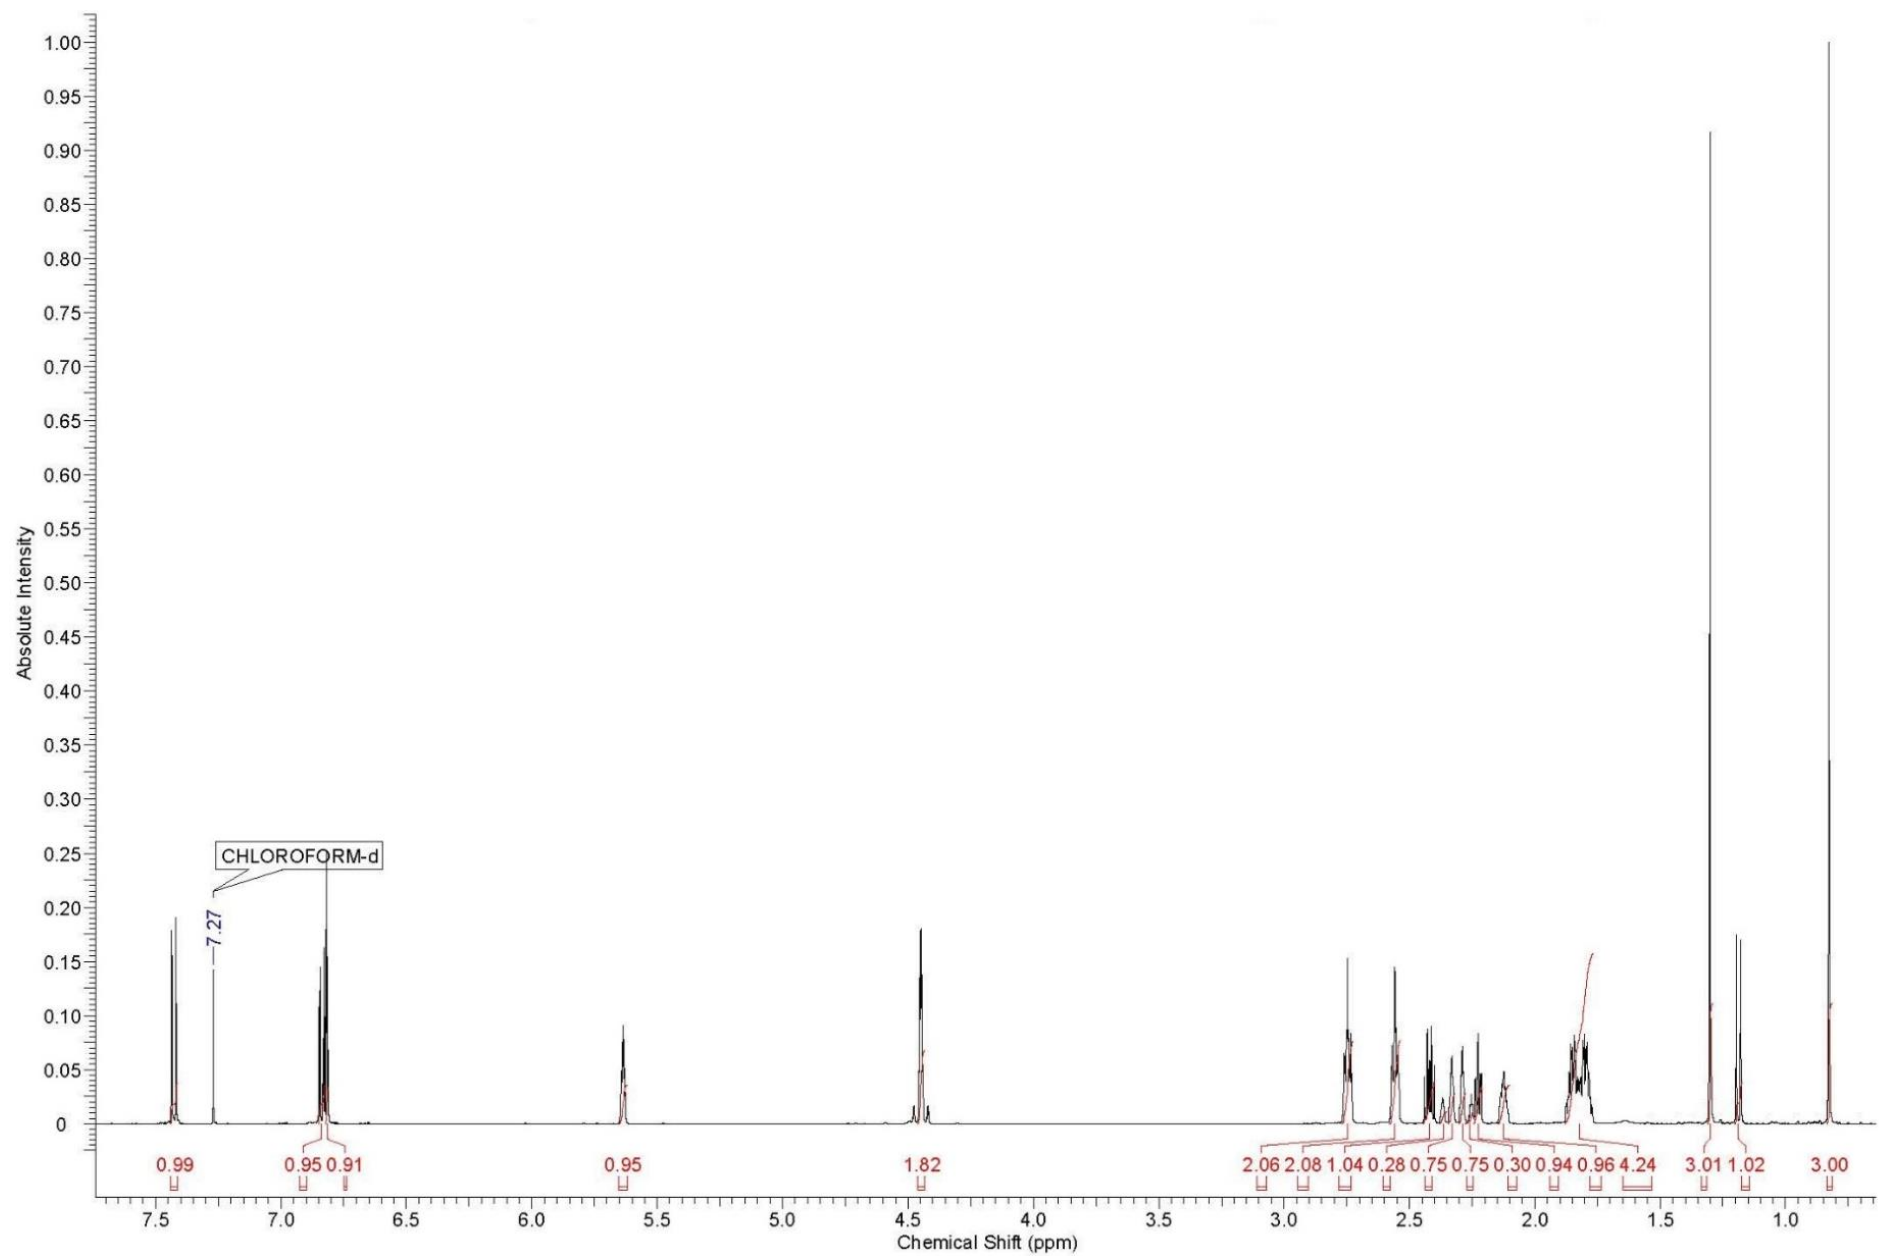

**Figure S12.** 3-(((1R,5S)-6,6-Dimethylbicyclo[3.1.1]hept-2-en-2-yl)methoxy)-7,8,9,10-tetrahydro-6H-benzo[c]chromen-6-one  $^1\text{H}$  NMR spectrum (8b).

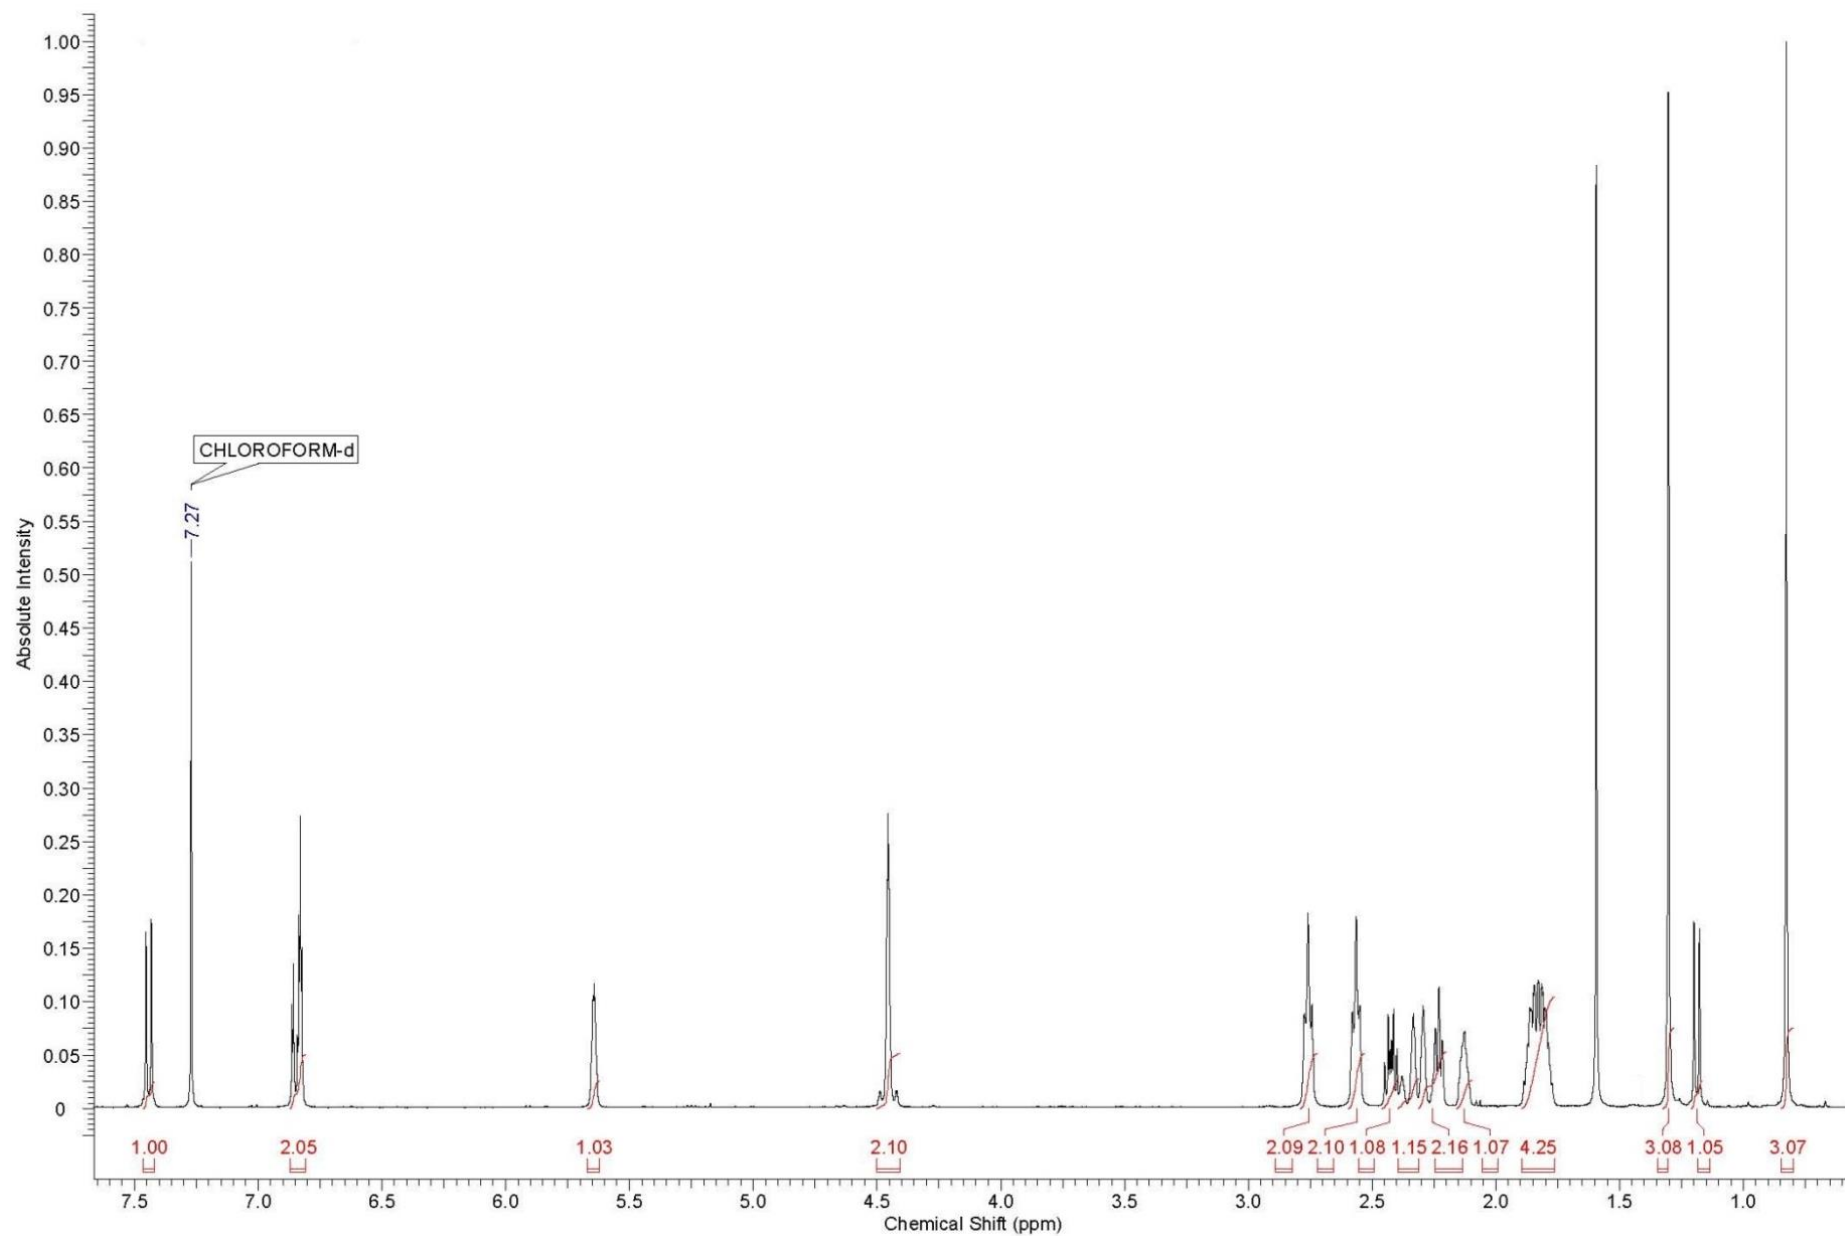

**Figure S13.** 3-(((1S,5R)-6,6-Dimethylbicyclo[3.1.1]hept-2-en-2-yl)methoxy)-7,8,9,10-tetrahydro-6H-benzo[c]chromen-6-one <sup>1</sup>H NMR spectrum (8c).



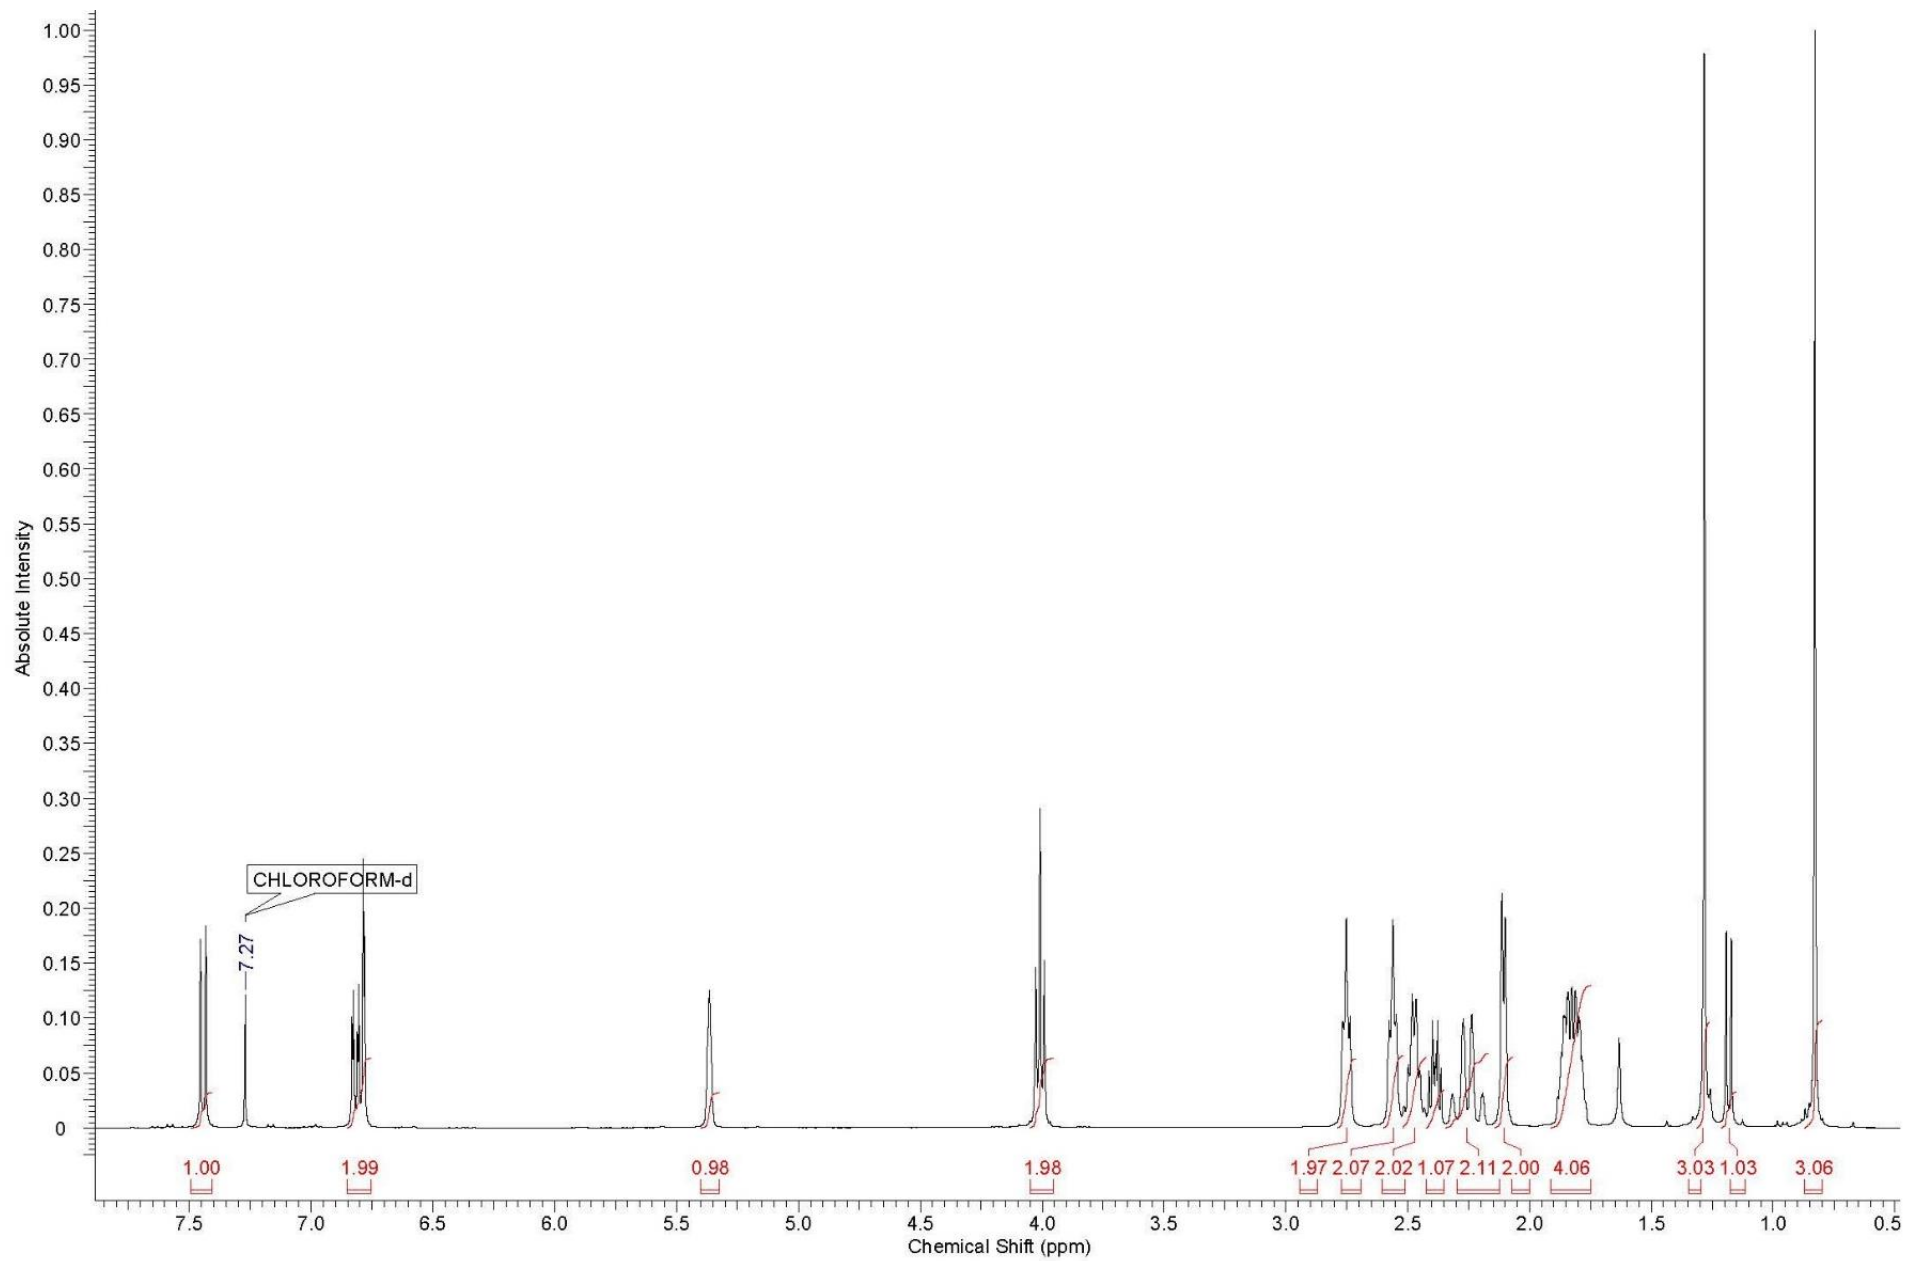

**Figure S14.** 3-(2-((1R,5S)-6,6-Dimethylbicyclo[3.1.1]hept-2-en-2-yl)ethoxy)-7,8,9,10-tetrahydro-6H-benzo[c]chromen-6-one <sup>1</sup>H NMR spectrum (8d).

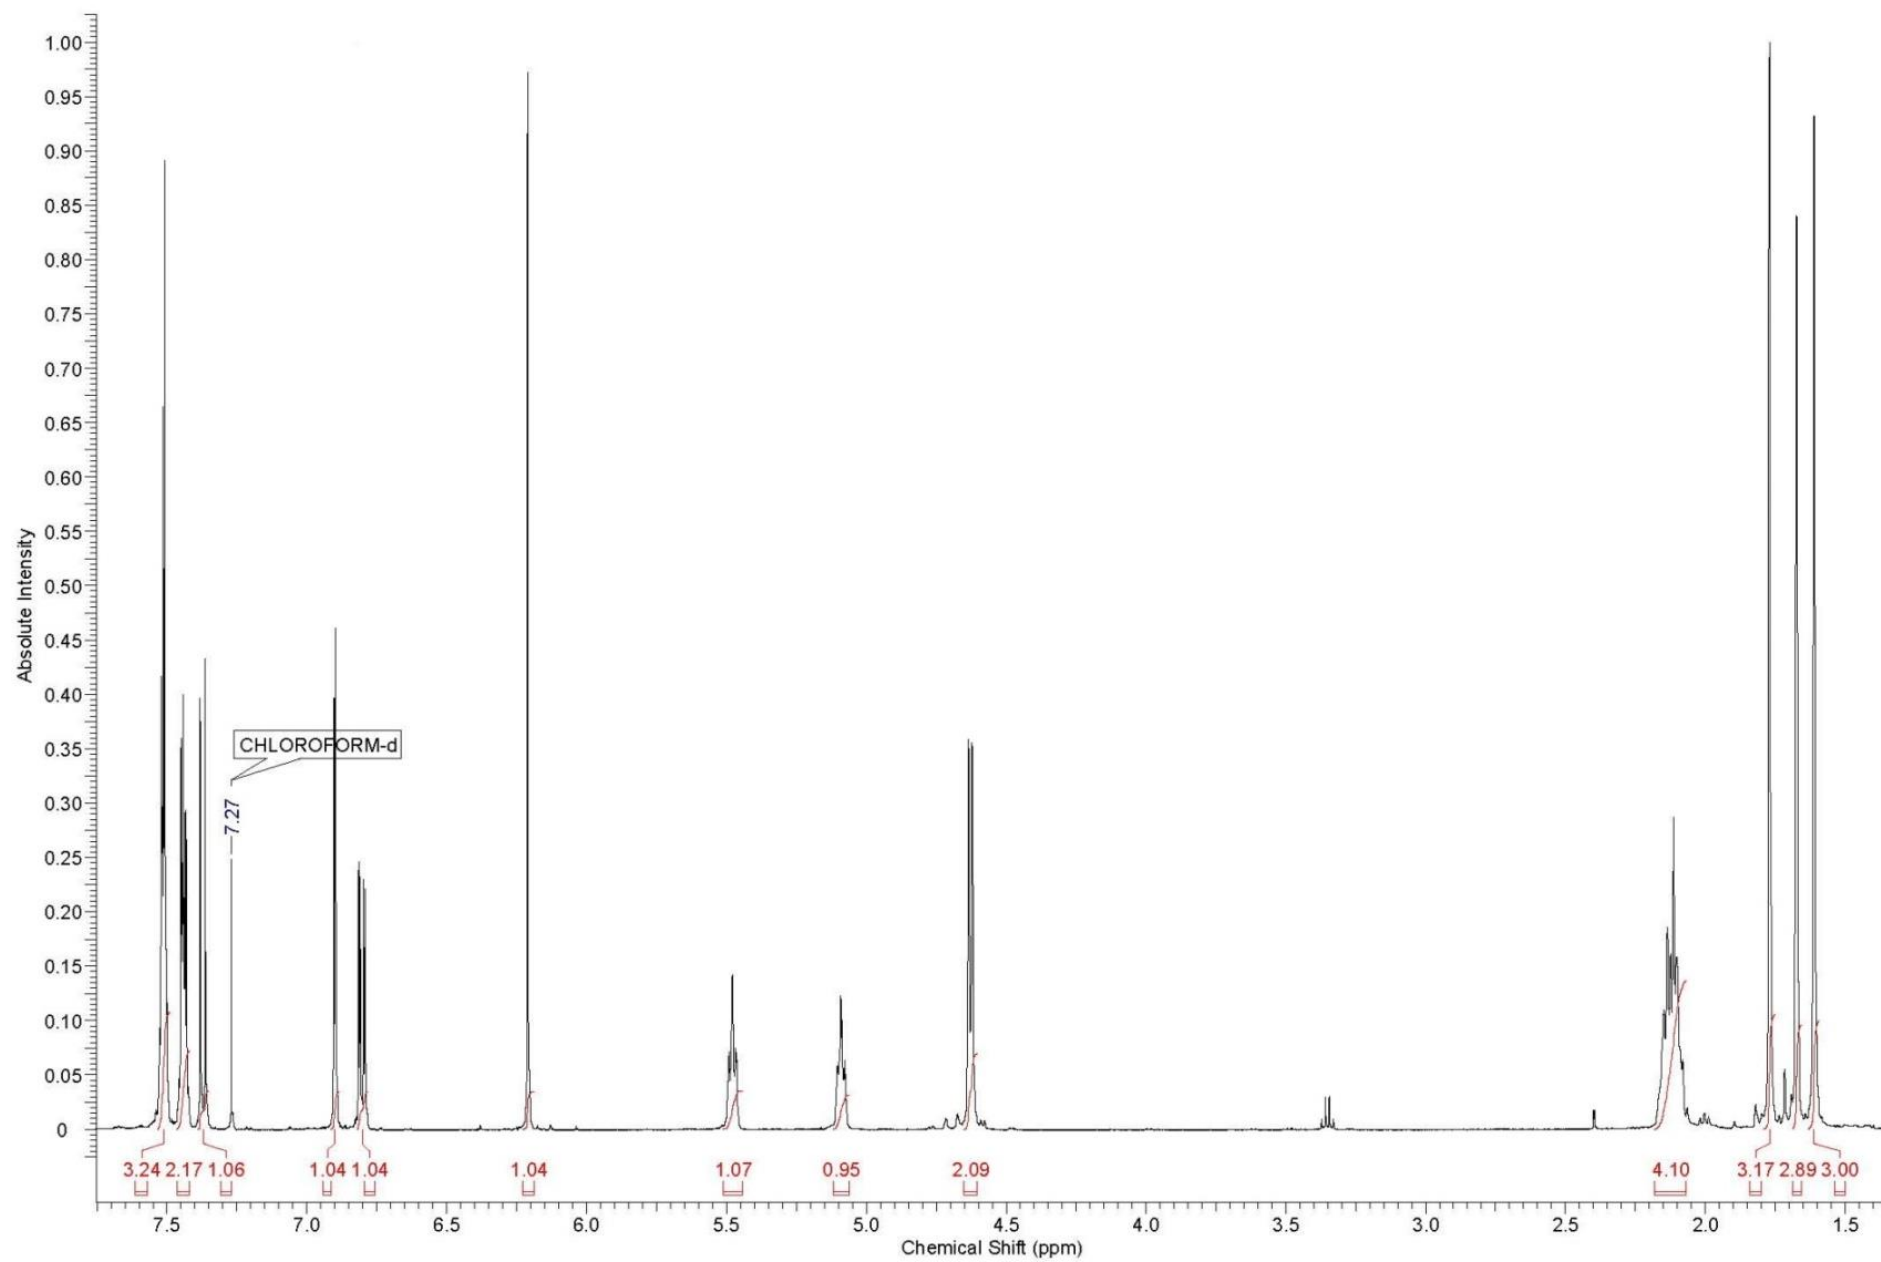

Figure S15. (E)-7-(3,7-Dimethylocta-2,6-dienyloxy)-4-phenyl-2H-chromen-2-one  $^1\text{H}$  NMR spectrum (9a).

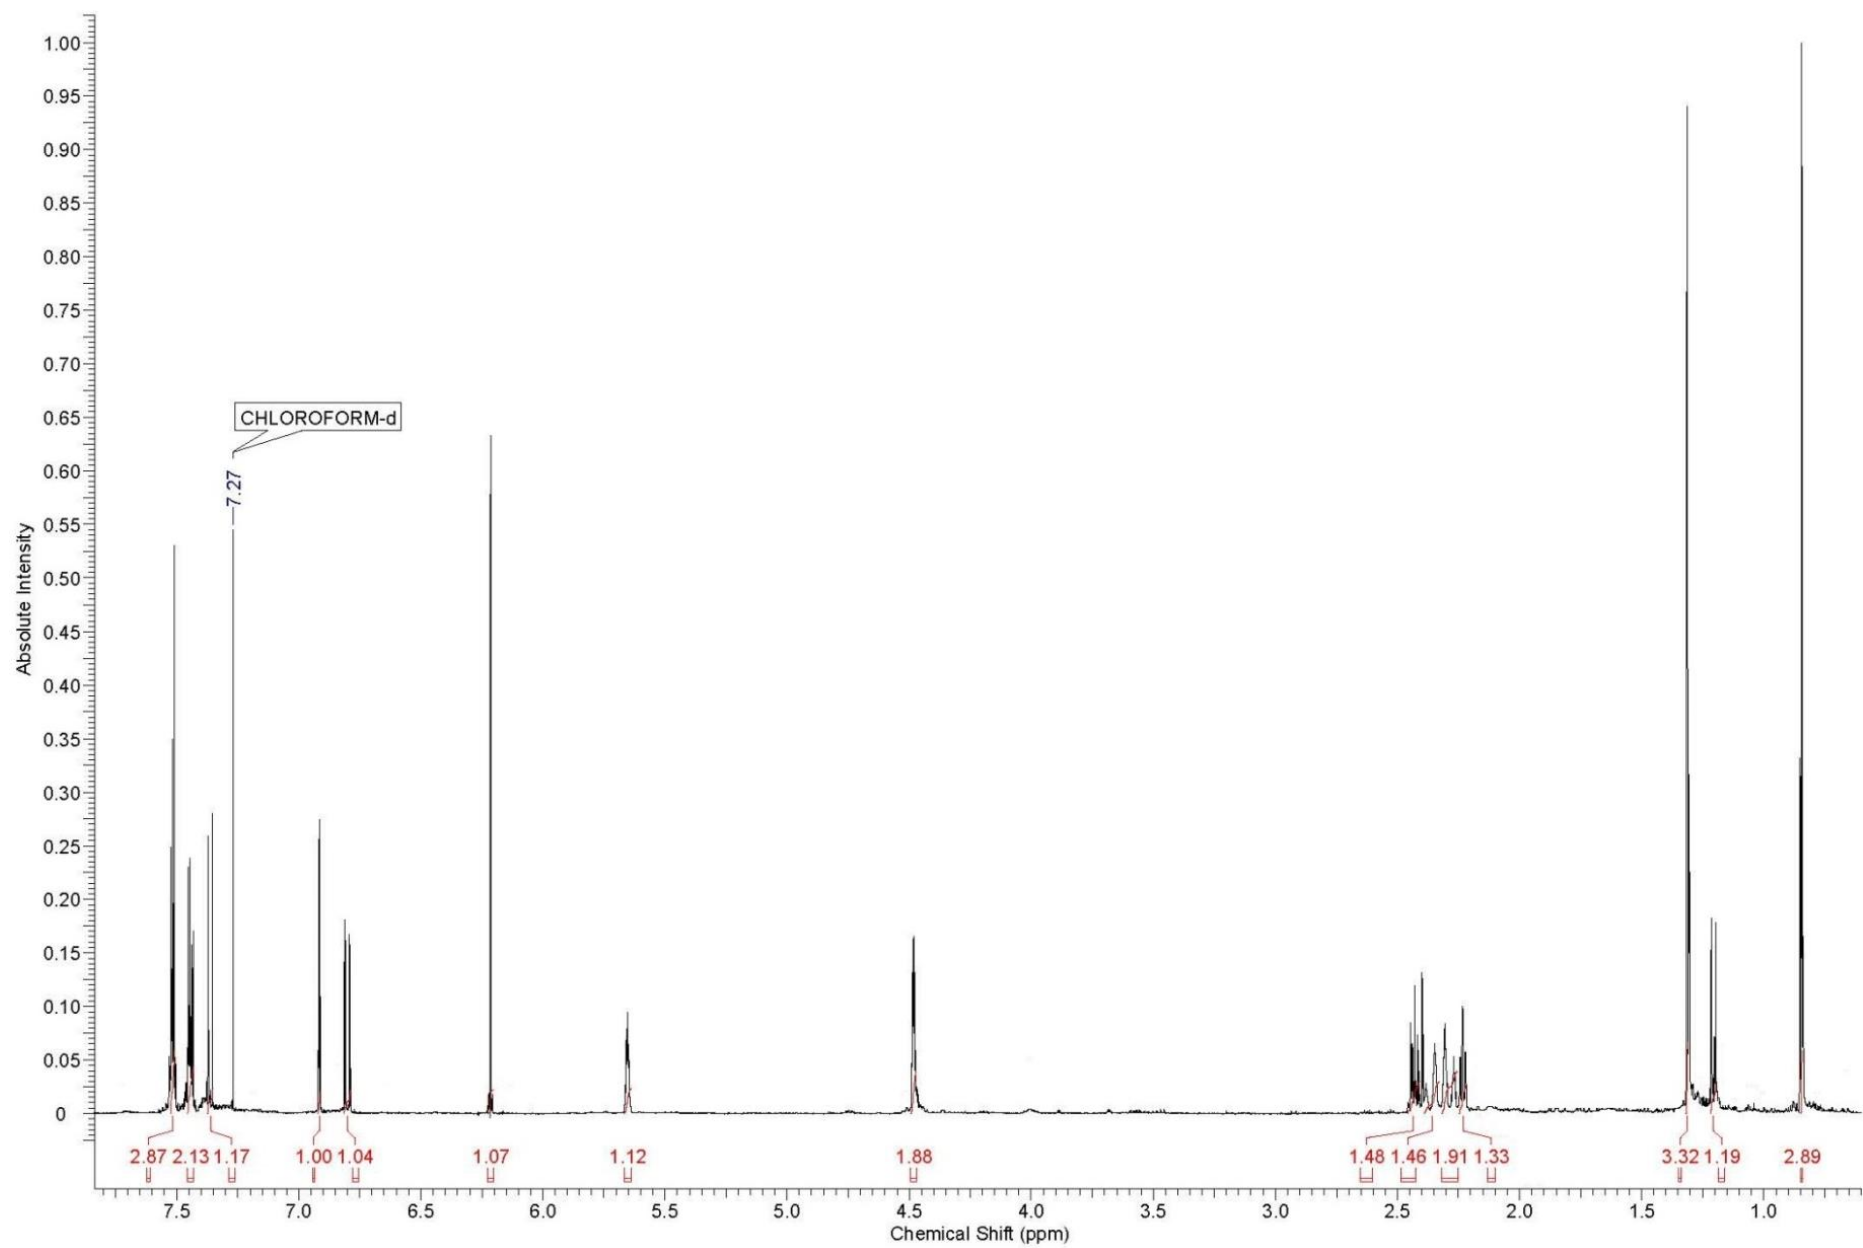

Figure S16. 7-(((1R,5S)-6,6-Dimethylbicyclo[3.1.1]hept-2-en-2-yl)methoxy)-4-phenyl-2H-chromen-2-one  $^1\text{H}$  NMR spectrum (9b).

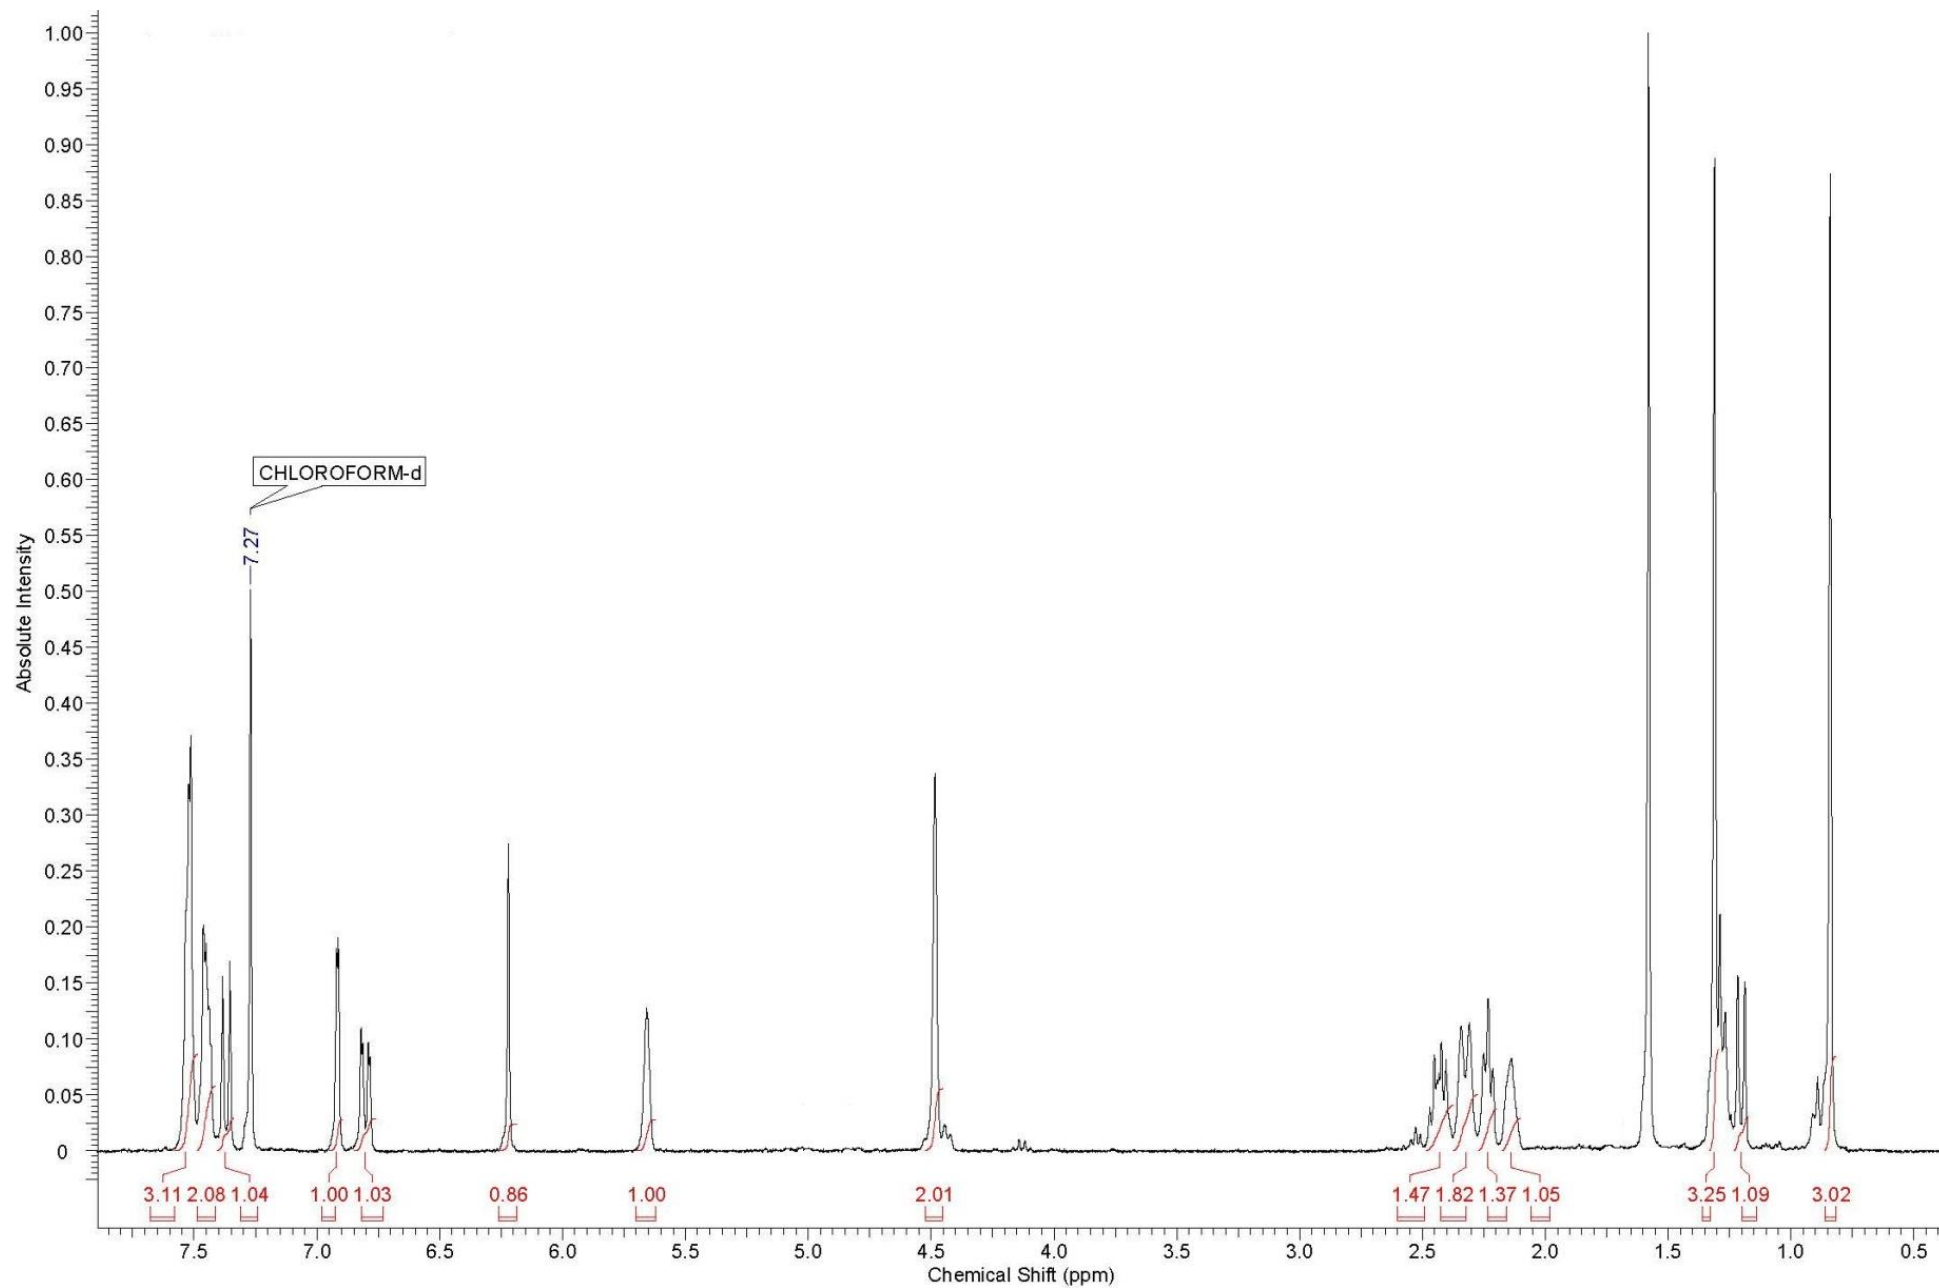

**Figure S17.** 7-(((1S,5R)-6,6-Dimethylbicyclo[3.1.1]hept-2-en-2-yl)methoxy)-4-phenyl-2H-chromen-2-one <sup>1</sup>H NMR spectrum (9c).

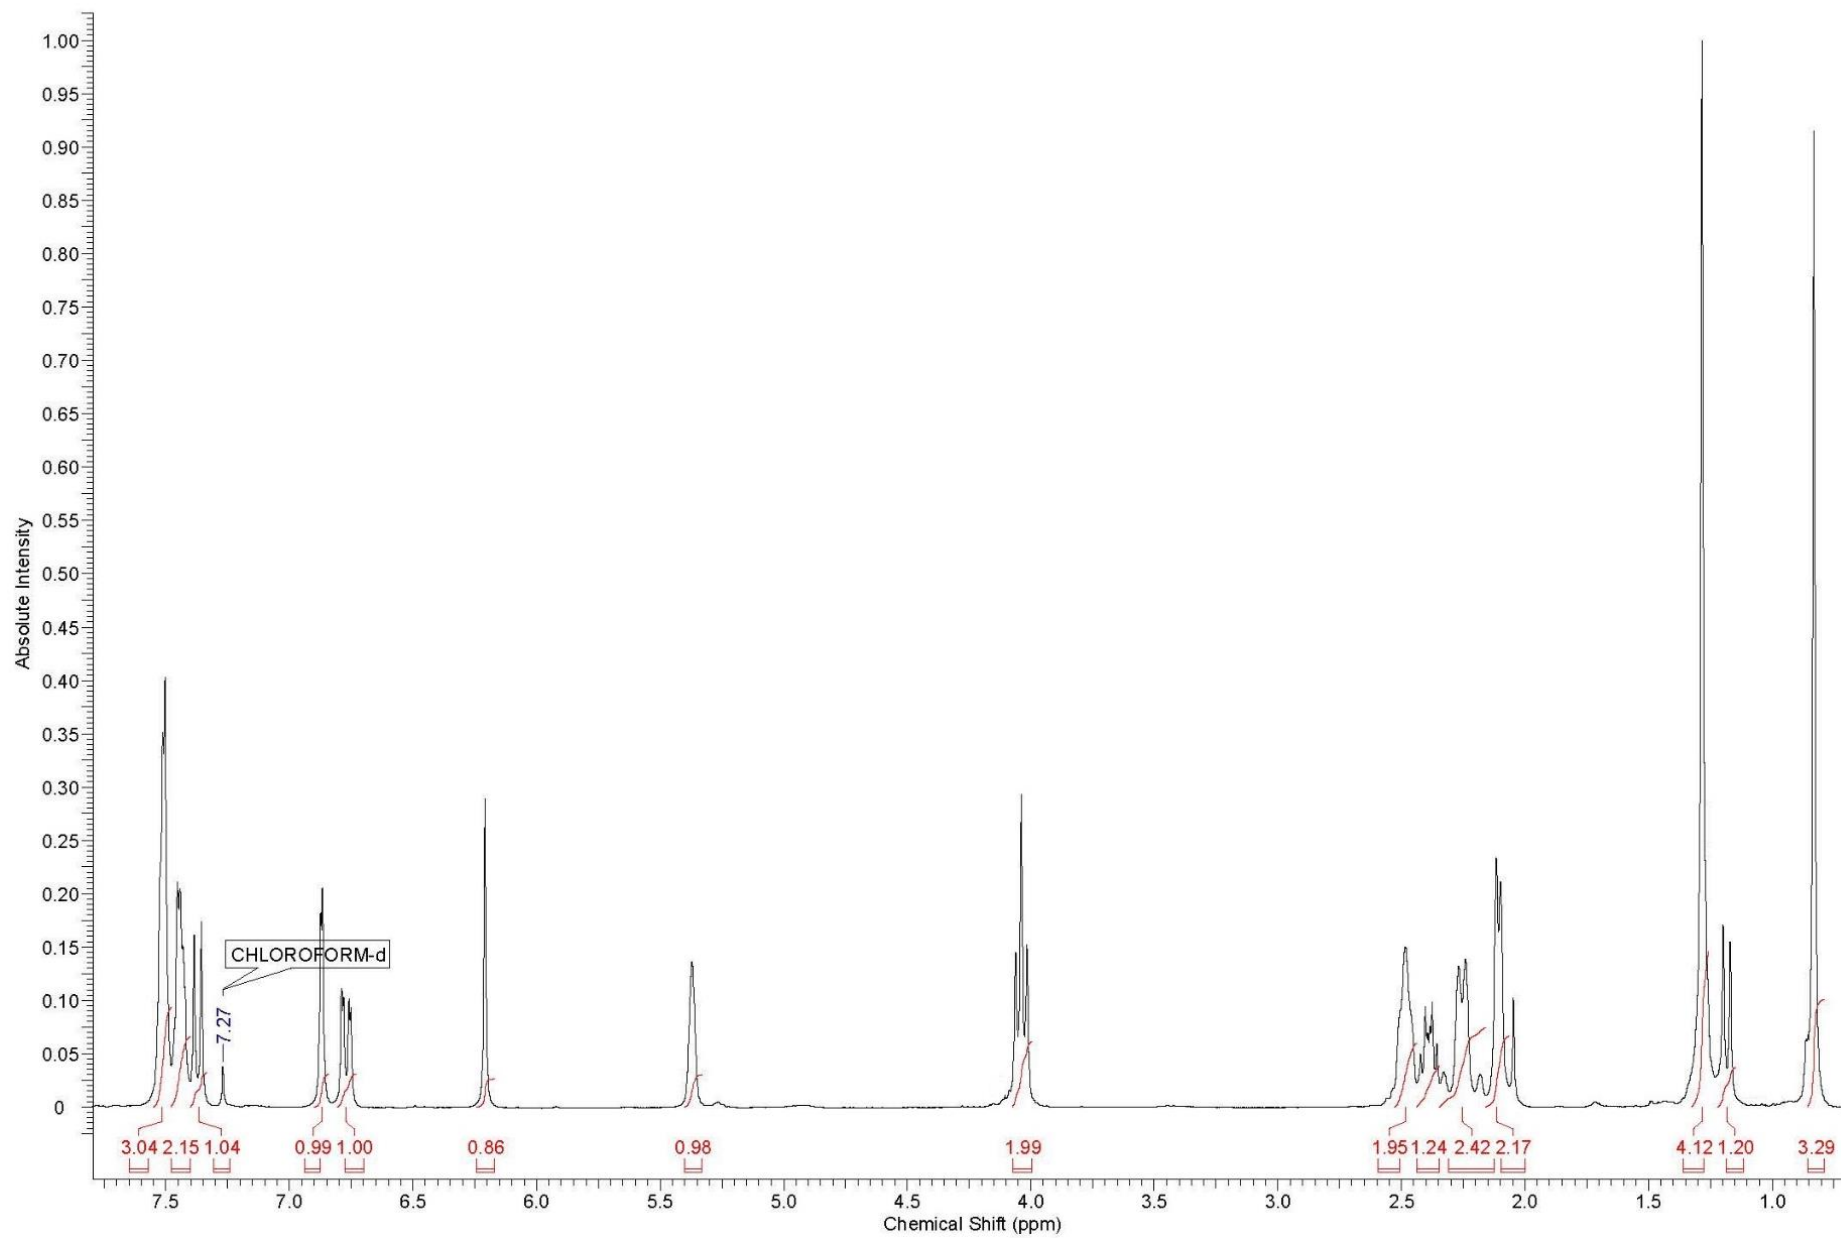

**Figure S18.** 7-(2-((1R,5S)-6,6-dimethylbicyclo[3.1.1]hept-2-en-2-yl)ethoxy)-4-phenyl-2H-chromen-2-one <sup>1</sup>H NMR spectrum (9d).

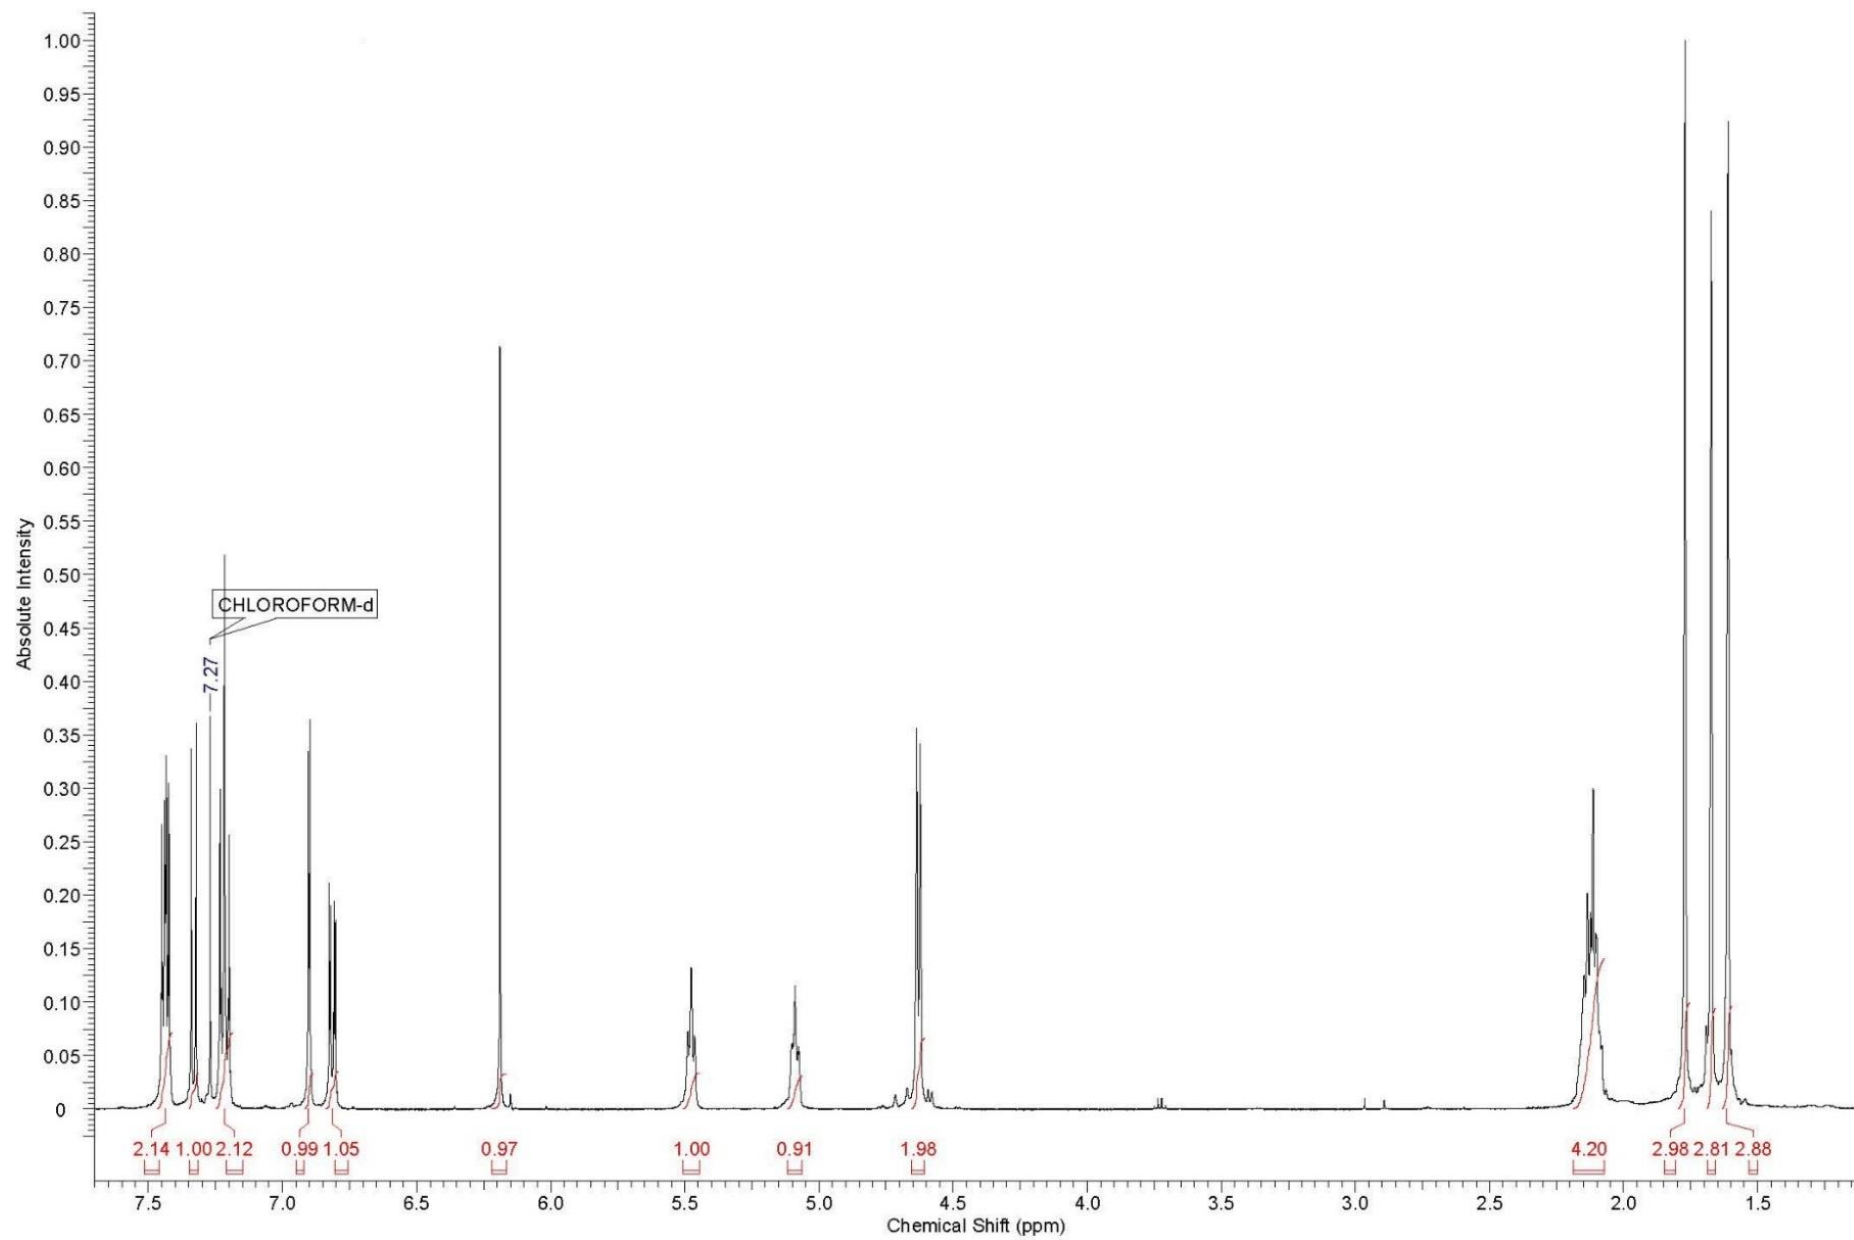

**Figure S19.** (E)-7-(3,7-Dimethylocta-2,6-dienyloxy)-4-(4-fluorophenyl)-2H-chromen-2-one  $^1\text{H}$  NMR spectrum (10a).

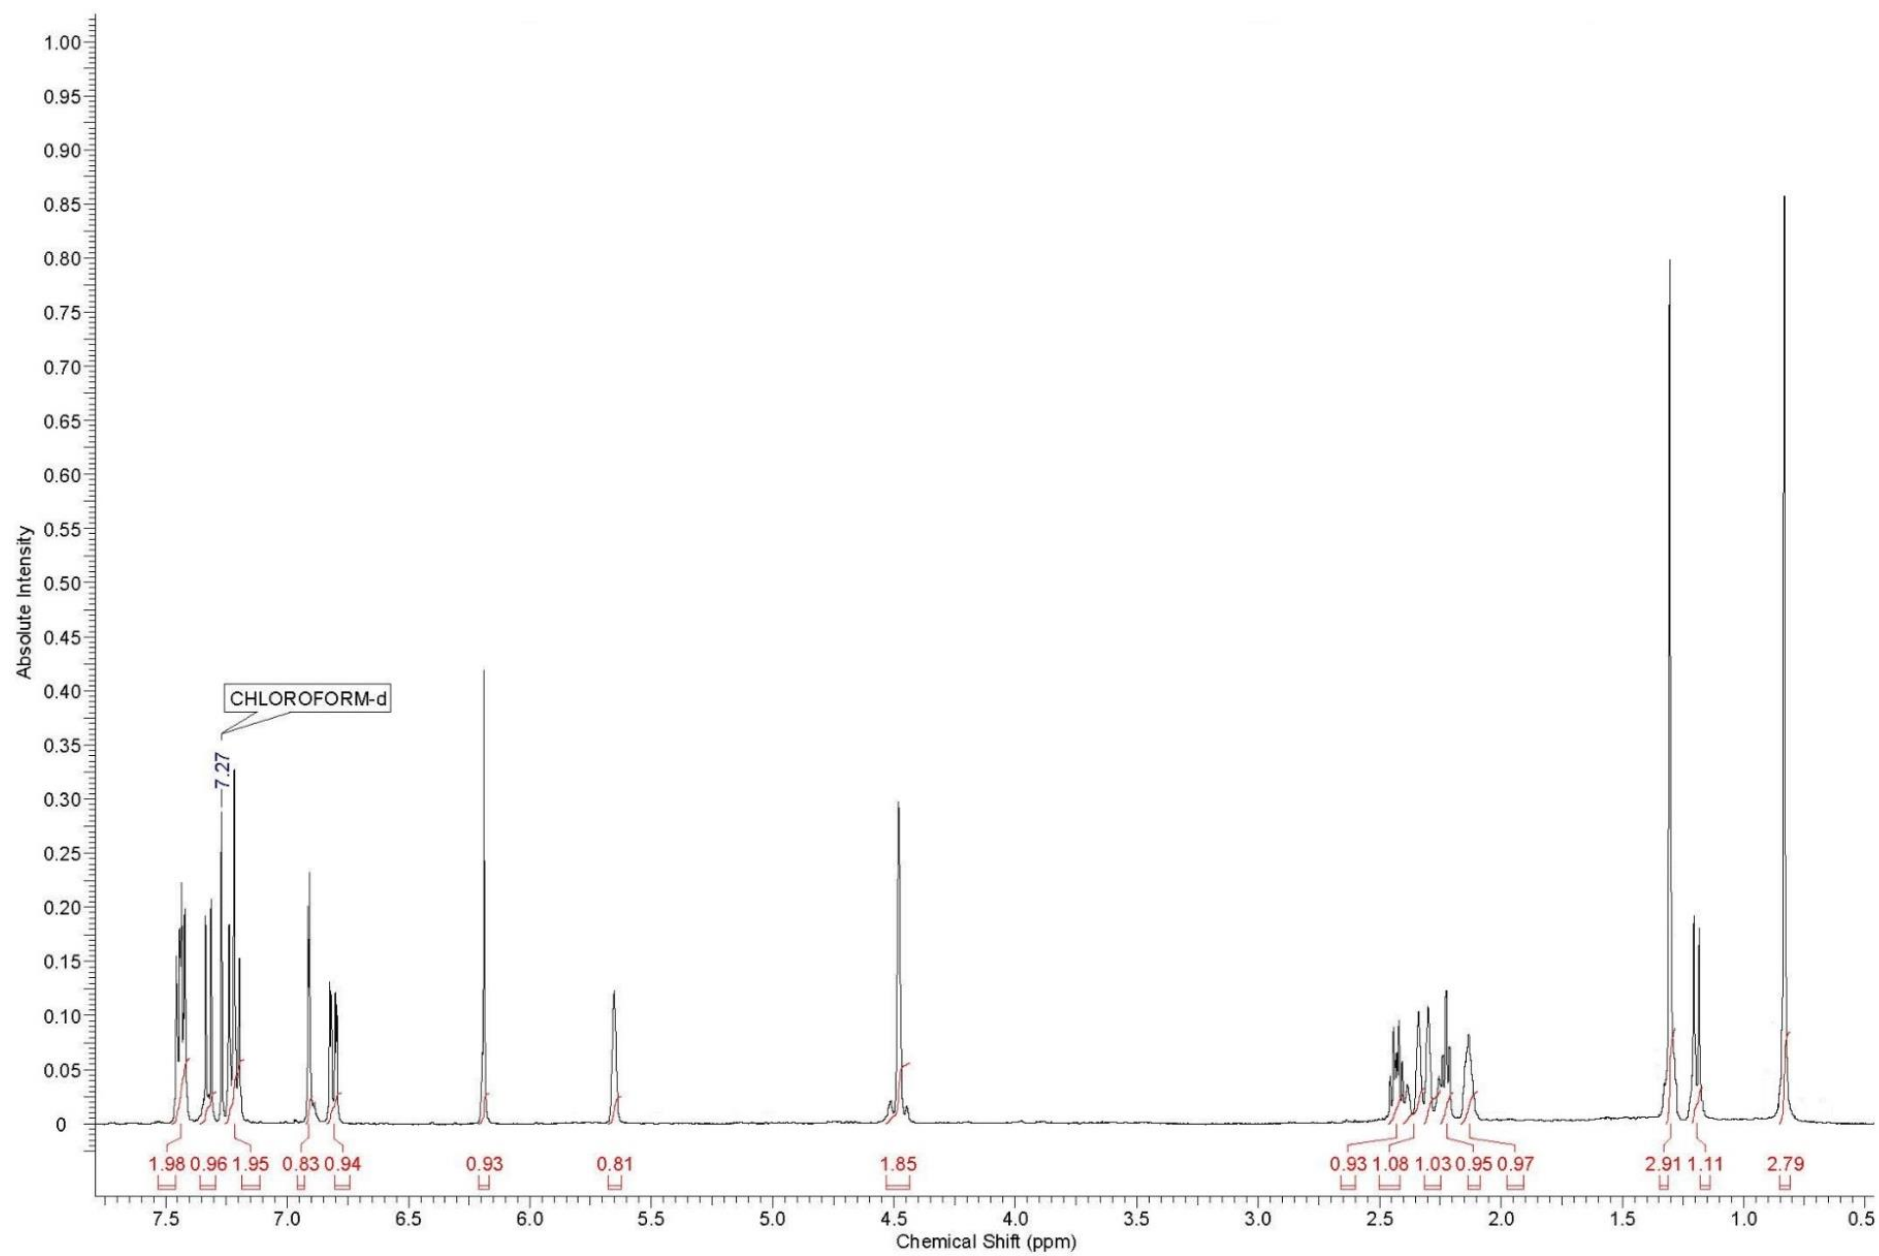

**Figure S20.** 7-(((1R,5S)-6,6-Dimethylbicyclo[3.1.1]hept-2-en-2-yl)methoxy)-4-(4-fluorophenyl)-2H-chromen-2-one <sup>1</sup>H NMR spectrum (10b).

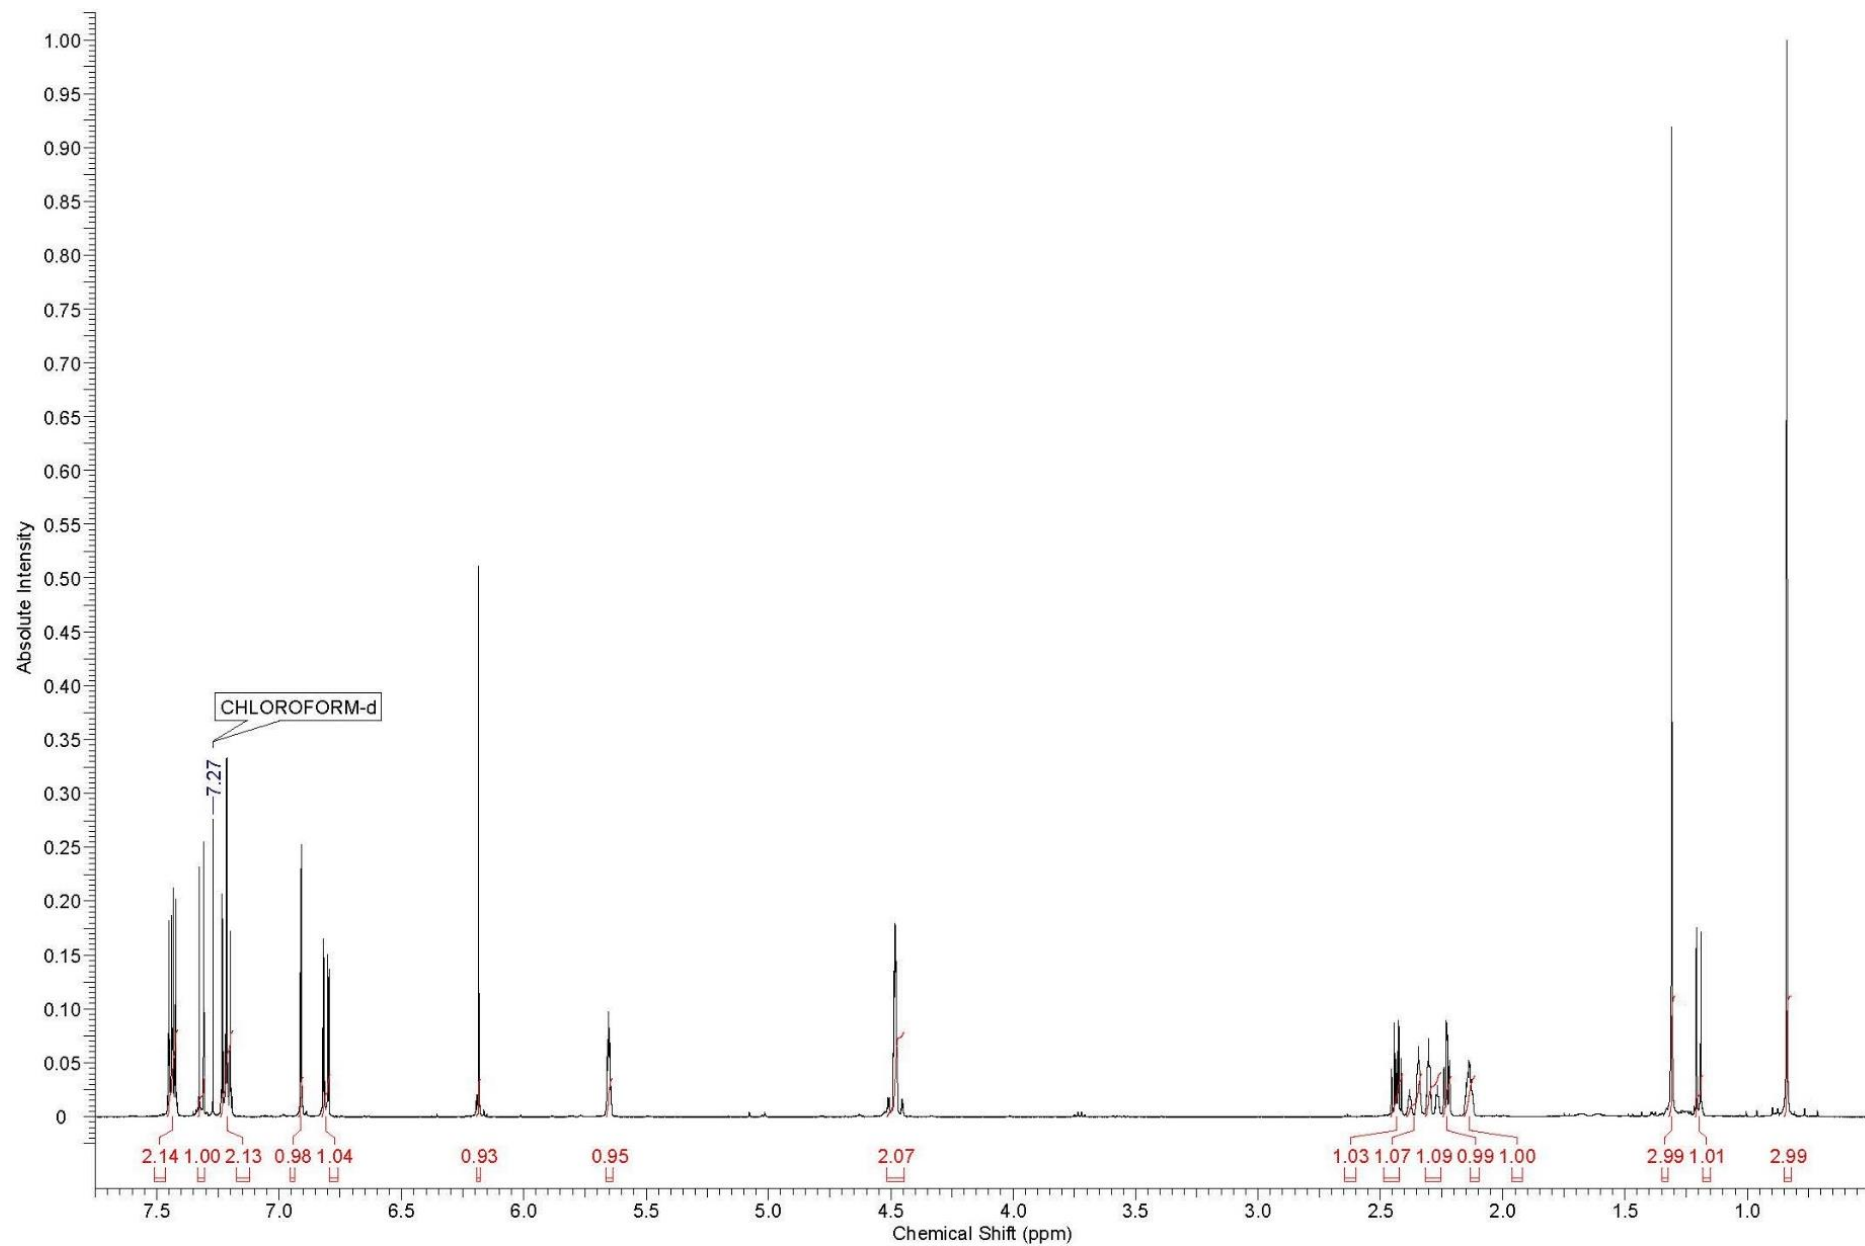

Figure S21. 7-(((1S,5R)-6,6-Dimethylbicyclo[3.1.1]hept-2-en-2-yl)methoxy)-4-(4-fluorophenyl)-2H-chromen-2-one <sup>1</sup>H NMR spectrum (10c).



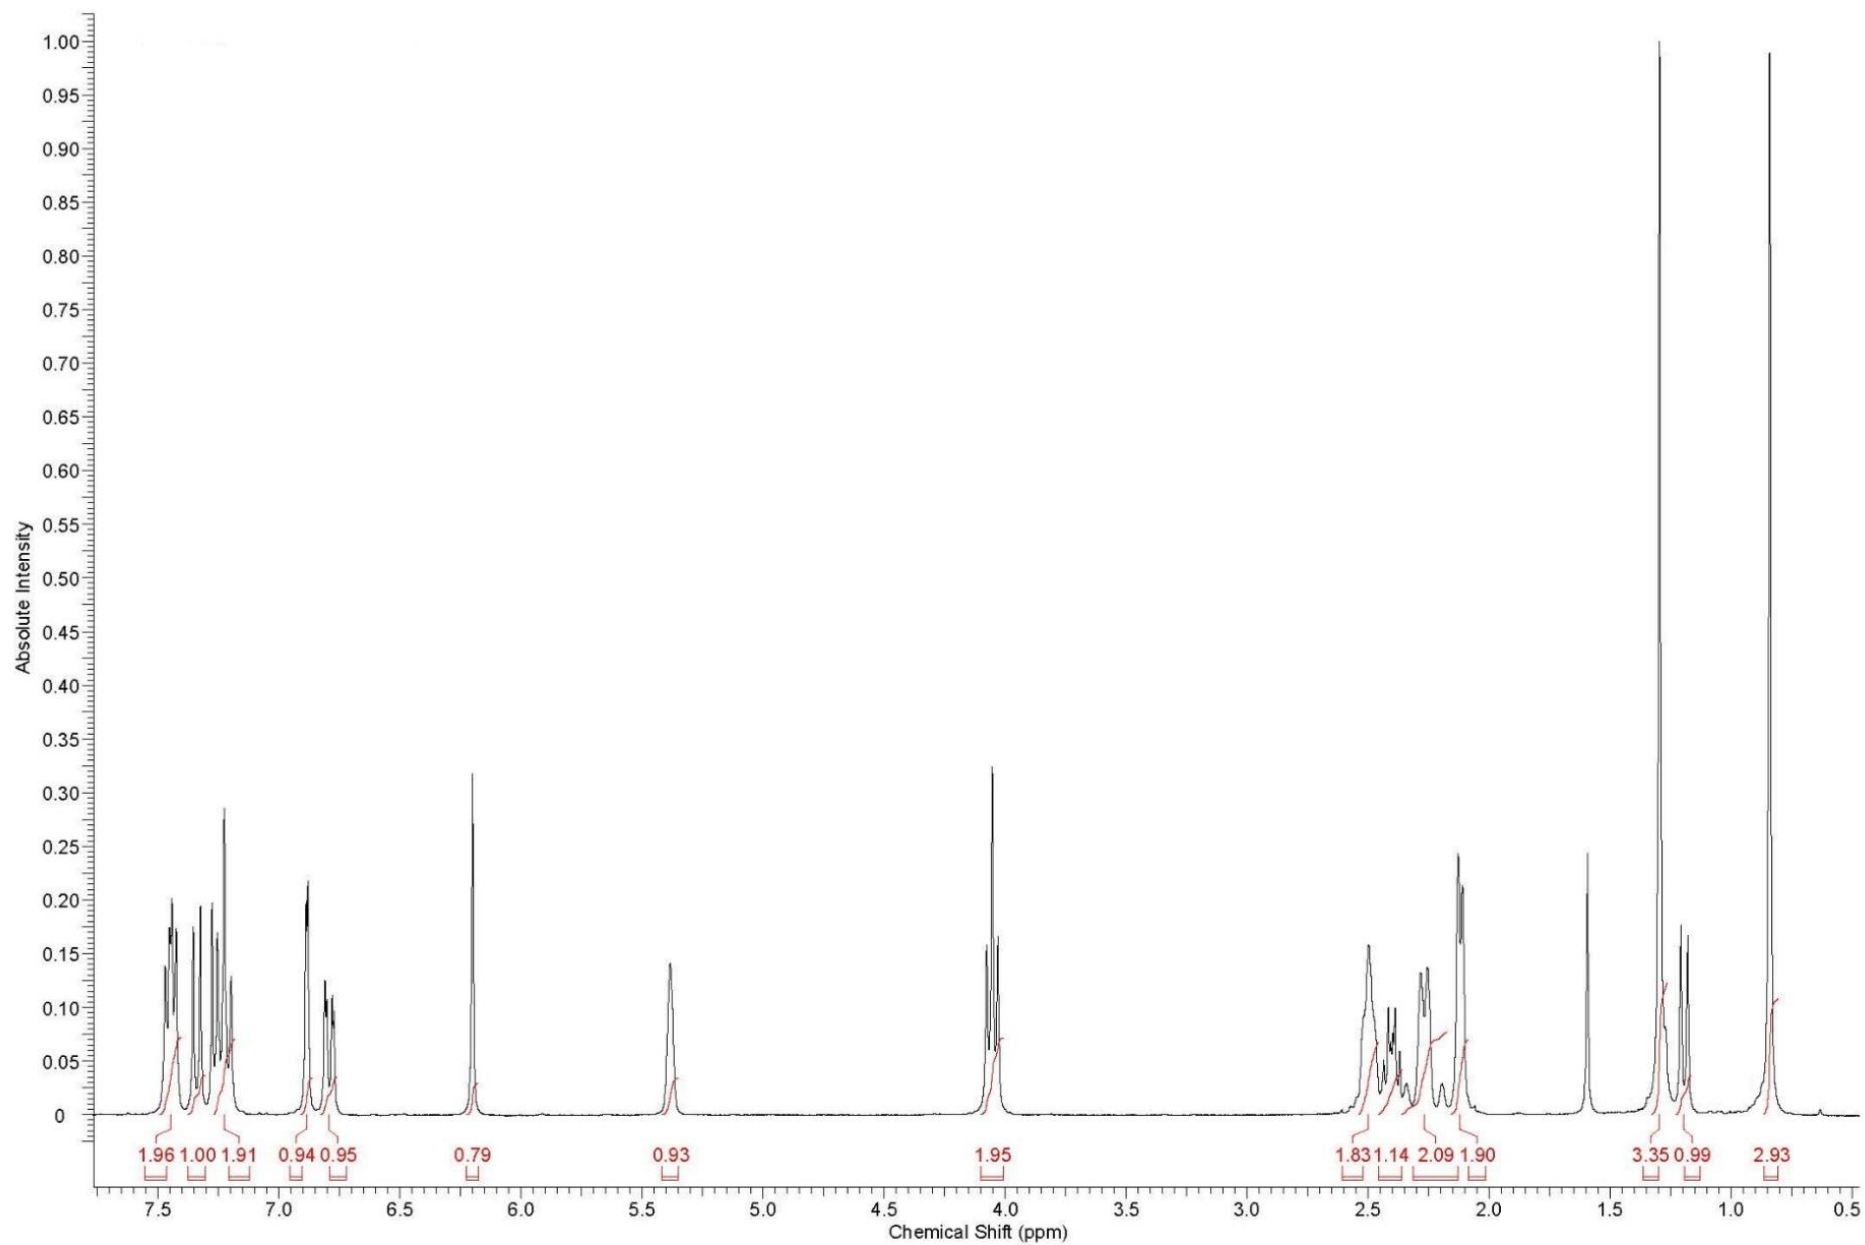

**Figure S22.** 7-(2-((1R,5S)-6,6-Dimethylbicyclo[3.1.1]hept-2-en-2-yl)ethoxy)-4-(4-fluorophenyl)-2H-chromen-2-one <sup>1</sup>H NMR spectrum (10d).

Results of the OGTT-1.

1

|                        | AUC (Glycemic curve) | SEM   |
|------------------------|----------------------|-------|
| Control                | 1175,5               | 27,90 |
| Vildagliptin, 10 mg/kg | 748,5                | 18,22 |
| 9a, 15 mg/kg           | 1048,3               | 40,96 |
| 9c, 15 mg/kg           | 1376,0               | 26,29 |
| 10b, 15 mg/kg          | 1346,0               | 61,21 |

2

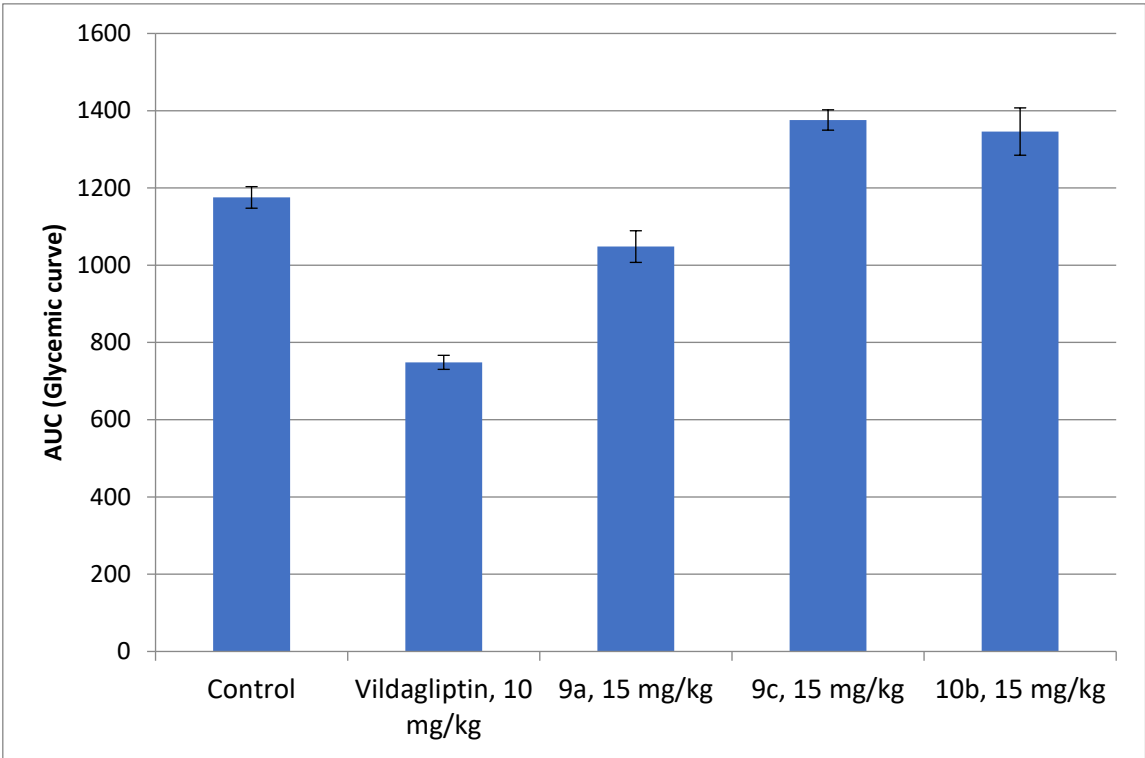

3

Figure S23. Data is presented as the area under the glycemic curve (AUC). \*p≤0,05 lower compared to the control group; #p≤0,05 higher compared to the control group (higher).

4

5

Results of the OGTT-2.

|                        | AUC (Glycemic curve) | SEM   |
|------------------------|----------------------|-------|
| Control                | 1736,0               | 32,08 |
| Vildagliptin, 10 mg/kg | 1134,8               | 49,61 |
| 7b, 10 mg/kg           | 1513,0               | 54,37 |
| 10c, 15 mg/kg          | 1664,0               | 32,48 |

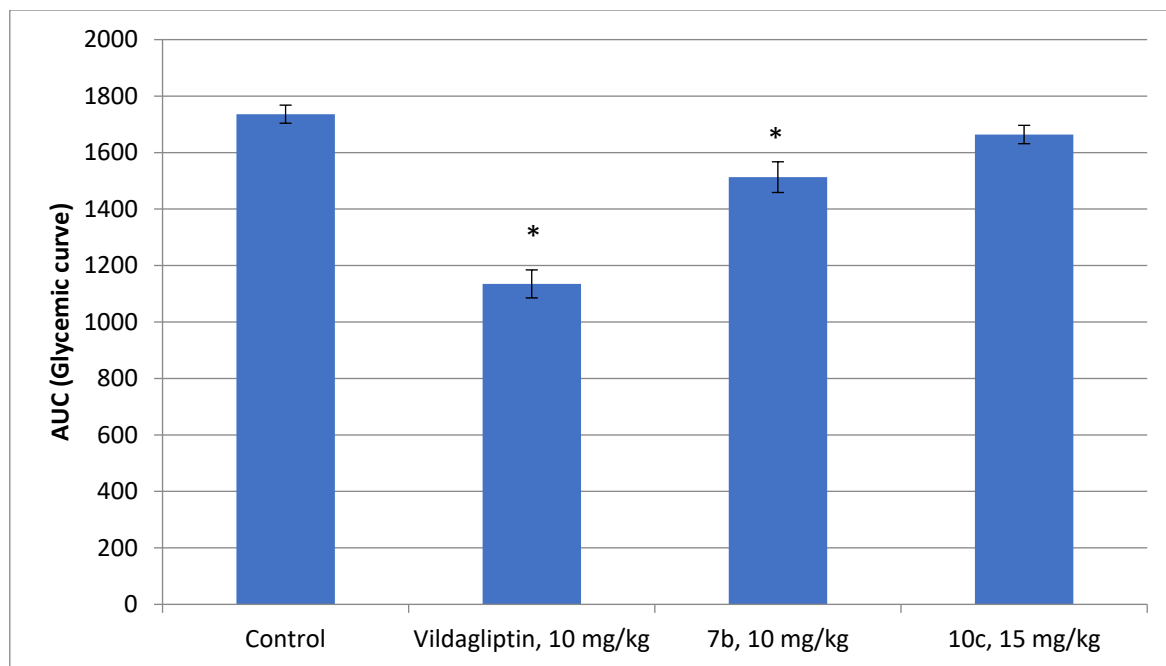

**Figure S24.** lower compared to the control group; # $p \leq 0,05$  higher compared to the control group (higher).

6  
7  
8
